# Supplementary material for: Direct synthesis of cis-dihalido-bis(NHC) complex of nickel(ii) and catalytic application in olefin addition polymerization: Effect of halogen co-ligands and density functional theory study
Source: Royal Society of Chemistry journal article supplement (doi:10.1039/c3dt50957e), 2013-01-01
Supplement: c3dt50957e.pdf [file c3dt50957e.pdf]

Supporting Information

## Direct Synthesis of *Cis*-Dihalo-Bis(NHC) Complex of Nickel (II) and Catalytic Application in Olefin Addition Polymerization: Effect of Halogen Co-Ligands and Theory Study

Dao Zhang,\* Sen Zhou, Zhiming Li, Quanrui Wang and Linhong Weng

P1, **Figure S1.** The  $^1\text{H}$  NMR spectrum of  $[\text{H}(\mathbf{1a})]\text{Br}$

P2, **Figure S2.** The  $^1\text{H}$  NMR spectrum of  $[\text{H}(\mathbf{1b})]\text{Br}$

P3, **Figure S3.** The  $^1\text{H}$  NMR spectrum of *trans*- $[(\mathbf{1a})_2\text{NiBr}_2]$ , **2a**

P4, **Figure S4.** The  $^1\text{H}$  NMR spectrum of *trans*- $[(\mathbf{1b})_2\text{NiBr}_2]$ , **2b**

P5, **Figure S5.** The  $^1\text{H}$  NMR spectrum of *cis*- $[(\mathbf{1a})_2\text{NiBr}_2]$ , **3**

P6, **Figure S6.** The  $^1\text{H}$  NMR spectrum of  $[(\mathbf{1a})\text{AgBr}]$

P7, **Figure S7.** The  $^1\text{H}$  NMR spectrum of  $[(\mathbf{1b})\text{AgBr}]$

P8, **Figure S8.** The  $^1\text{H}$  NMR spectrum of  $[\text{Ag}(\text{PPh}_3)\text{Br}]_4$

周壽 15

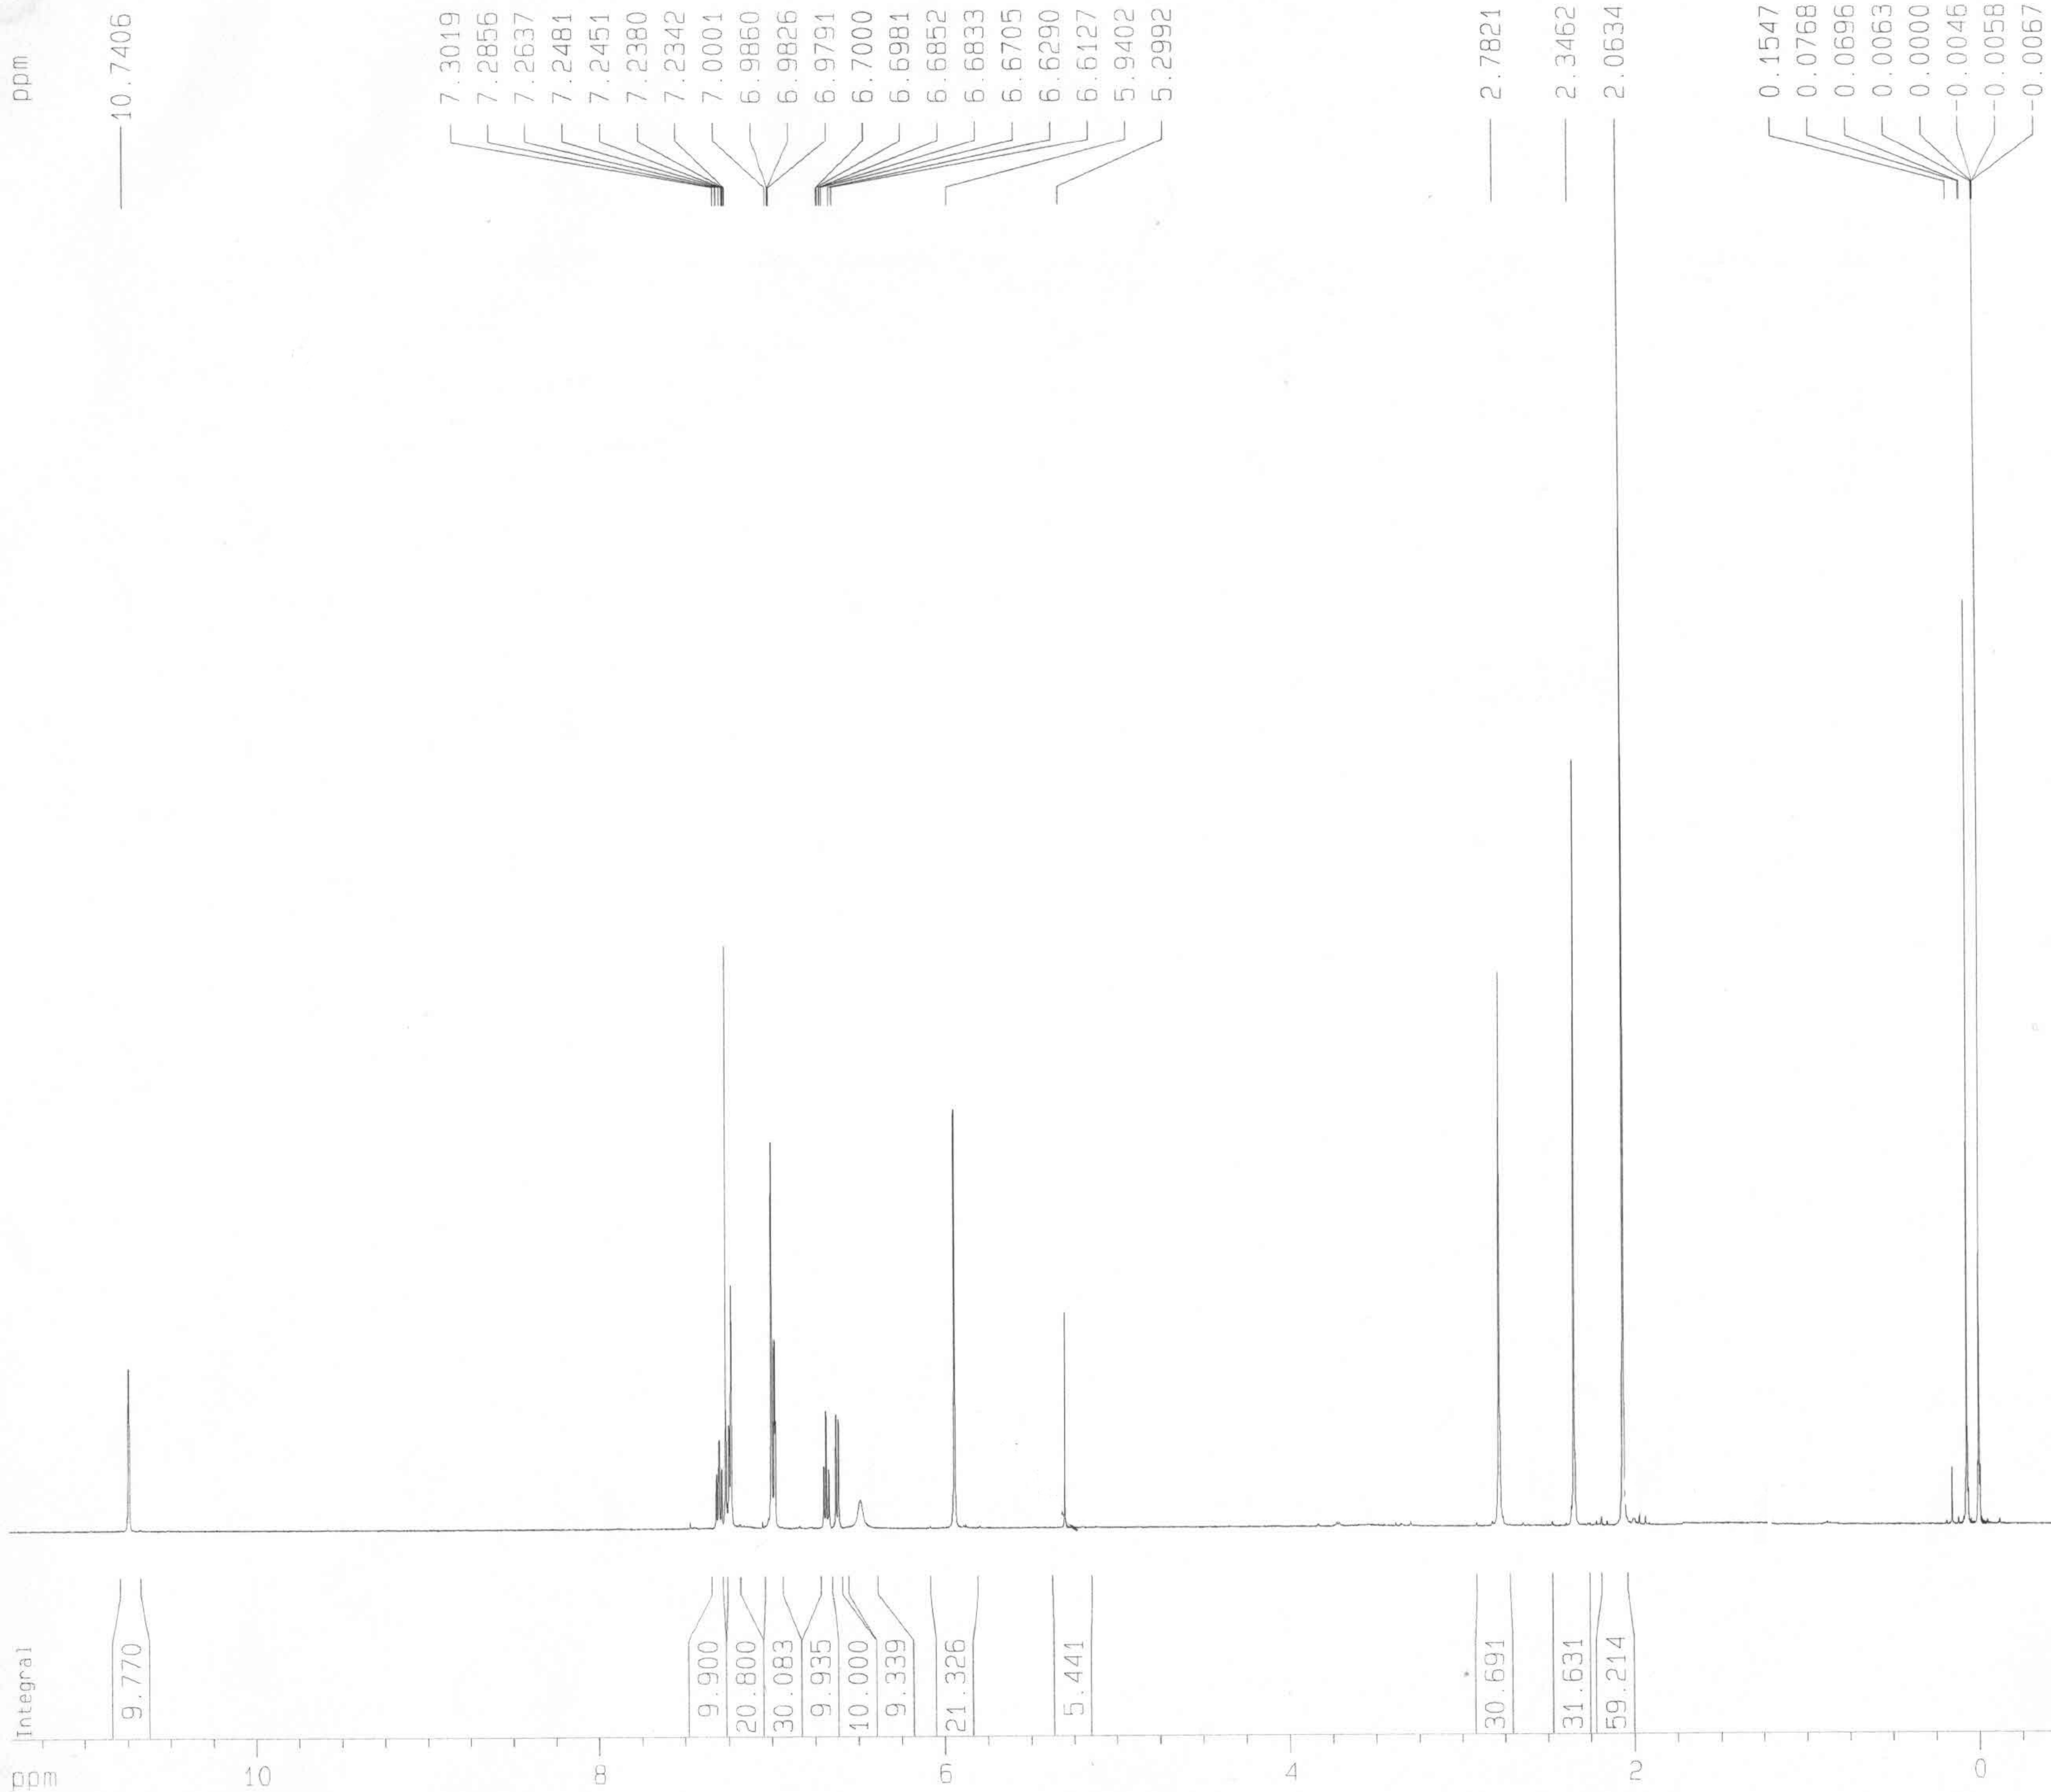

Current Data Parameters  
 NAME servzhousen  
 EXPNO 17  
 PROCNO 1

F2 - Acquisition Parameters  
 Date\_ 20100611  
 Time 10.51  
 INSTRUM dmx500  
 PROBHD 5 mm GNP 1H/13  
 PULPROG zg  
 TD 32768  
 SOLVENT CDC13  
 NS 16  
 DS 0  
 SWH 8503.401 Hz  
 FIDRES 0.259503 Hz  
 AQ 1.9268672 sec  
 RG 1024  
 DW 58.800 usec  
 DE 6.00 usec  
 TE 0.0 K  
 D1 6.0000000 sec  
 MCREST 0.0000000 sec  
 MCWRK 0.0150000 sec

===== CHANNEL f1 =====  
 NUC1 1H  
 P1 8.00 usec  
 PL1 3.00 dB  
 SF01 500.1337409 MHz

F2 - Processing parameters  
 SI 32768  
 SF 500.1300121 MHz  
 WDW no  
 SSB 0  
 LB 0.00 Hz  
 GB 0  
 PC 3.00

1D NMR plot parameters  
 CX 22.00 cm  
 CY 17.72 cm  
 F1P 11.440 ppm  
 F1 5721.44 Hz  
 F2P -0.472 ppm  
 F2 -236.24 Hz  
 PPMCM 0.54147 ppm/cm  
 HZCM 270.80344 Hz/cm

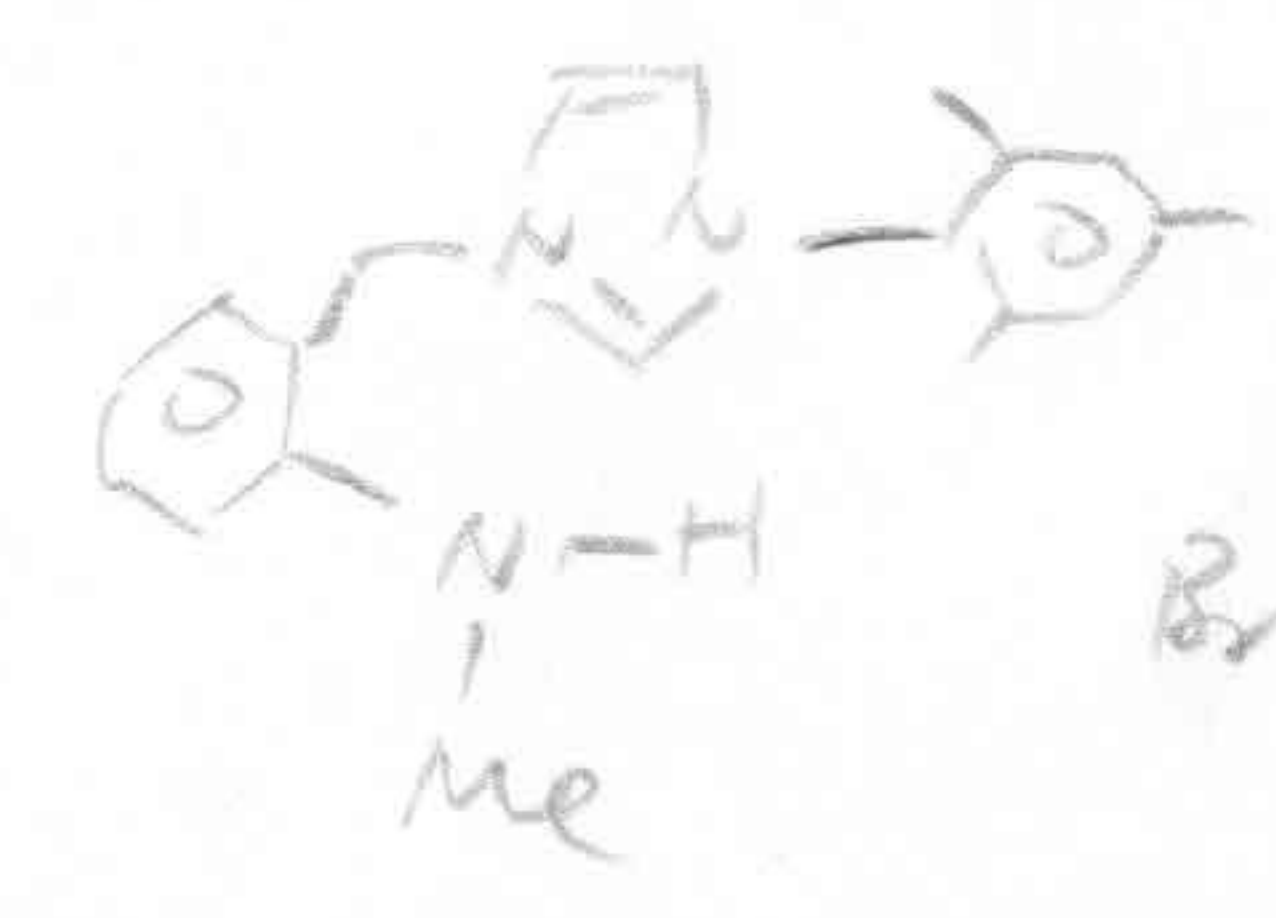



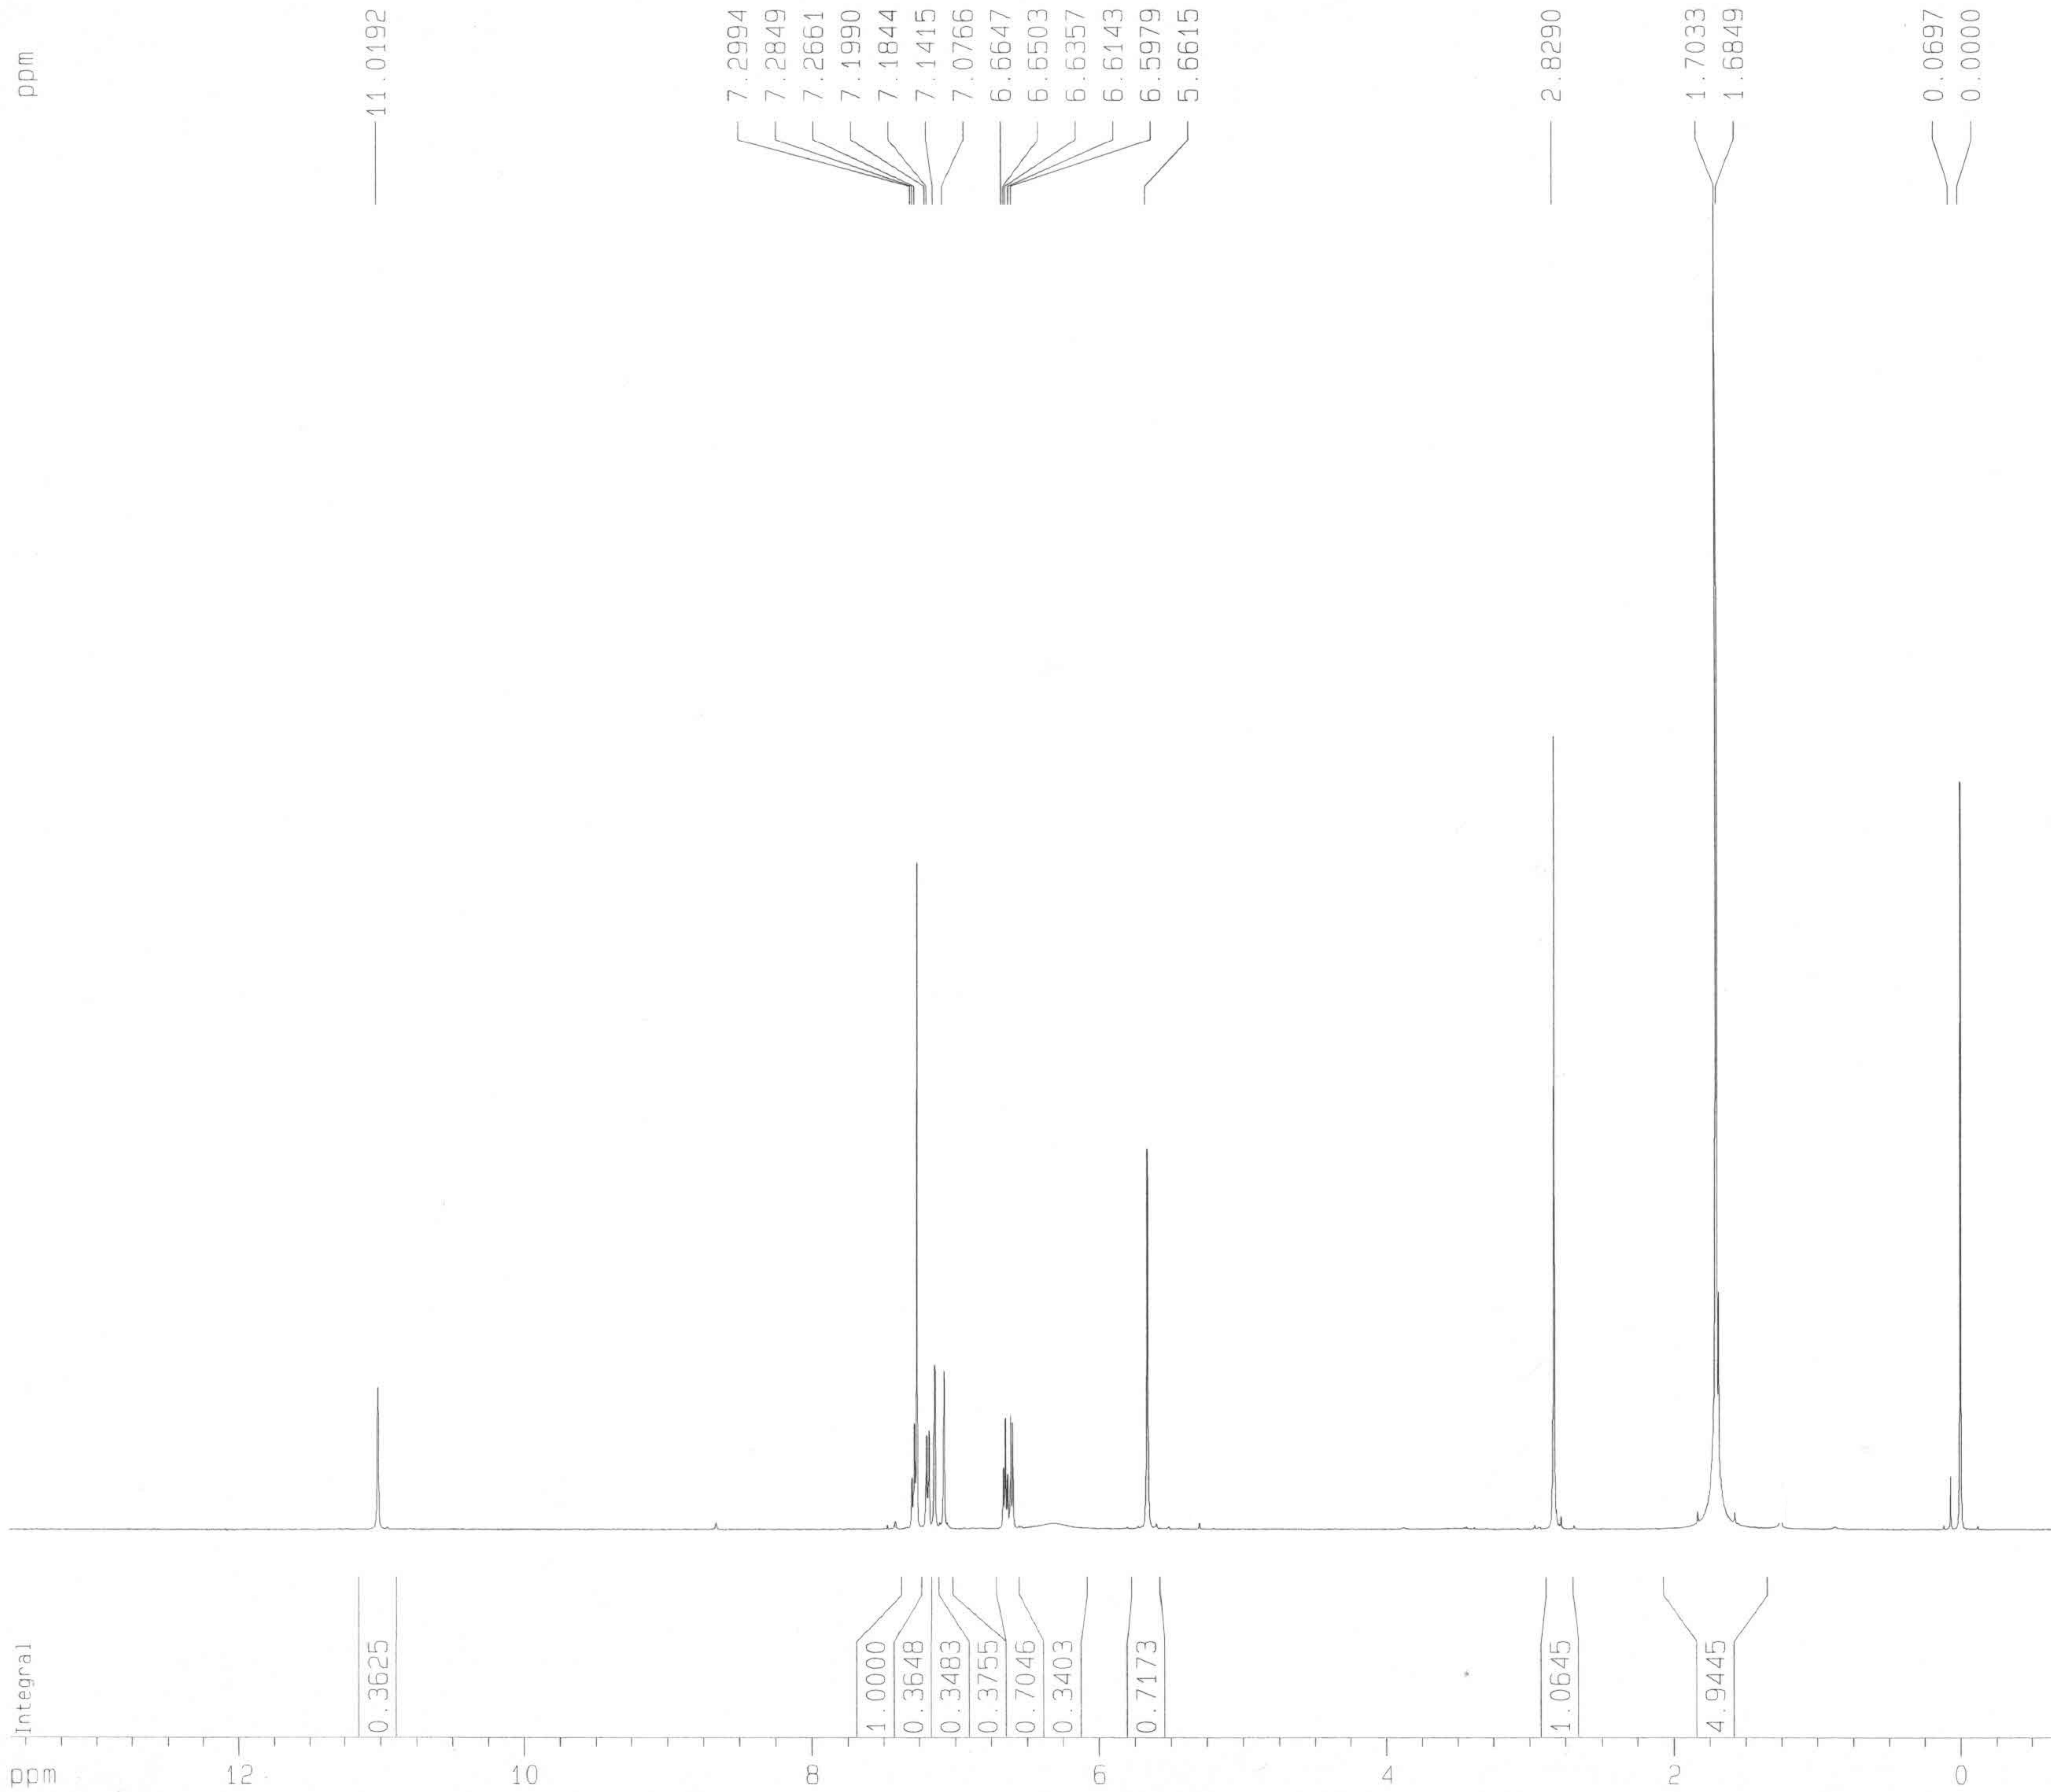

Current Data Parameters  
 NAME servzhausen  
 EXPNO 10  
 PROCNO 1

F2 - Acquisition Parameters  
 Date\_ 20100601  
 Time 11.21  
 INSTRUM dmx500  
 PROBHD 5 mm GNP 1H/13  
 PULPROG zg  
 TD 32768  
 SOLVENT CDCl3  
 NS 8  
 DS 0  
 SWH 8503.401 Hz  
 FIDRES 0.259503 Hz  
 AQ 1.9268672 sec  
 RG 1024  
 DW 58.800 usec  
 DE 6.00 usec  
 TE 0.0 K  
 D1 6.00000000 sec  
 MCREST 0.00000000 sec  
 MCWRK 0.01500000 sec

==== CHANNEL f1 =====  
 NUC1 1H  
 P1 8.00 usec  
 PL1 3.00 dB  
 SF01 500.1337409 MHz

F2 - Processing parameters  
 SI 32768  
 SF 500.1300110 MHz  
 WDW EM  
 SSB 0  
 LB 0.50 Hz  
 GB 0  
 PC 3.00

1D NMR plot parameters  
 CX 22.00 cm  
 CY 29.27 cm  
 F1P 13.614 ppm  
 F1 6808.75 Hz  
 F2P -0.703 ppm  
 F2 -351.51 Hz  
 PPMCM 0.65076 ppm/cm  
 HZCM 325.46640 Hz/cm

10

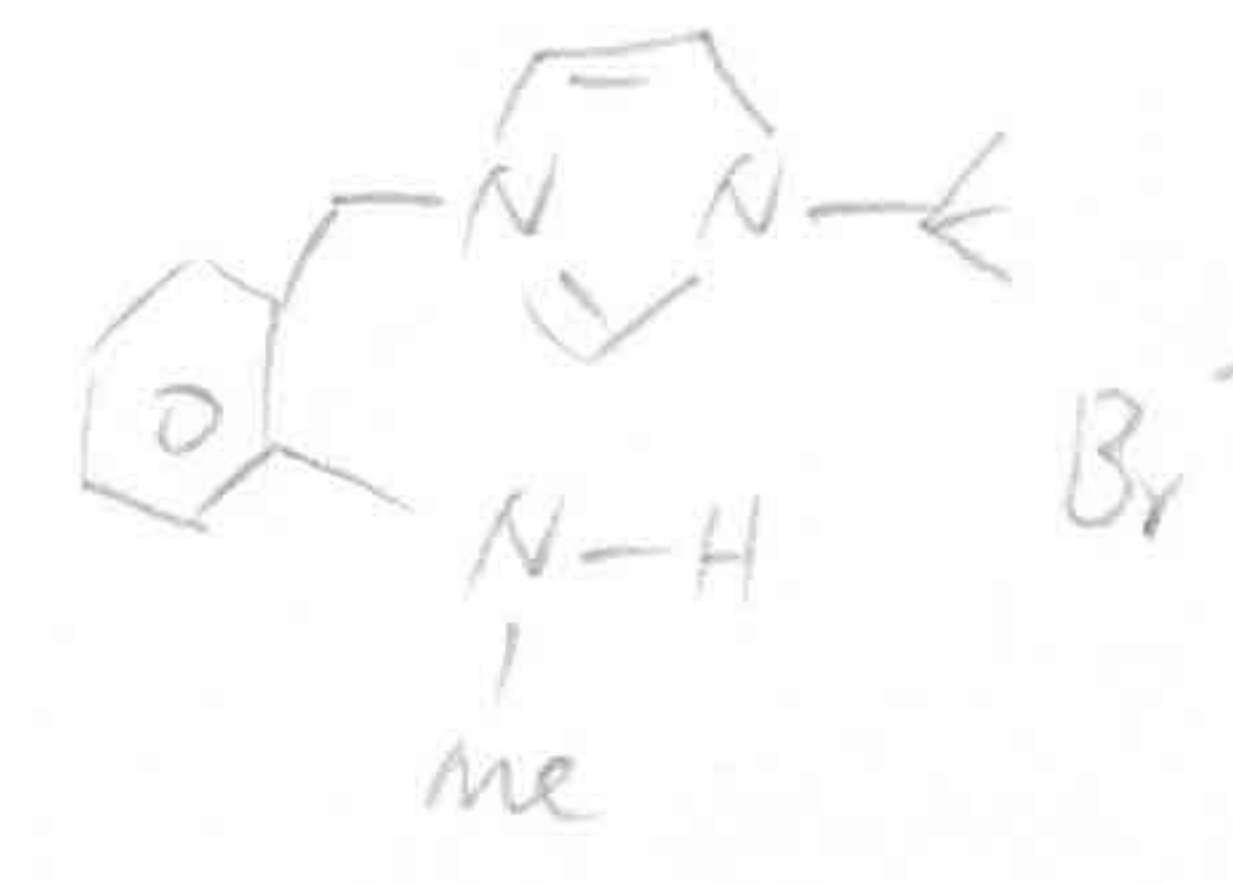



周壽 1103

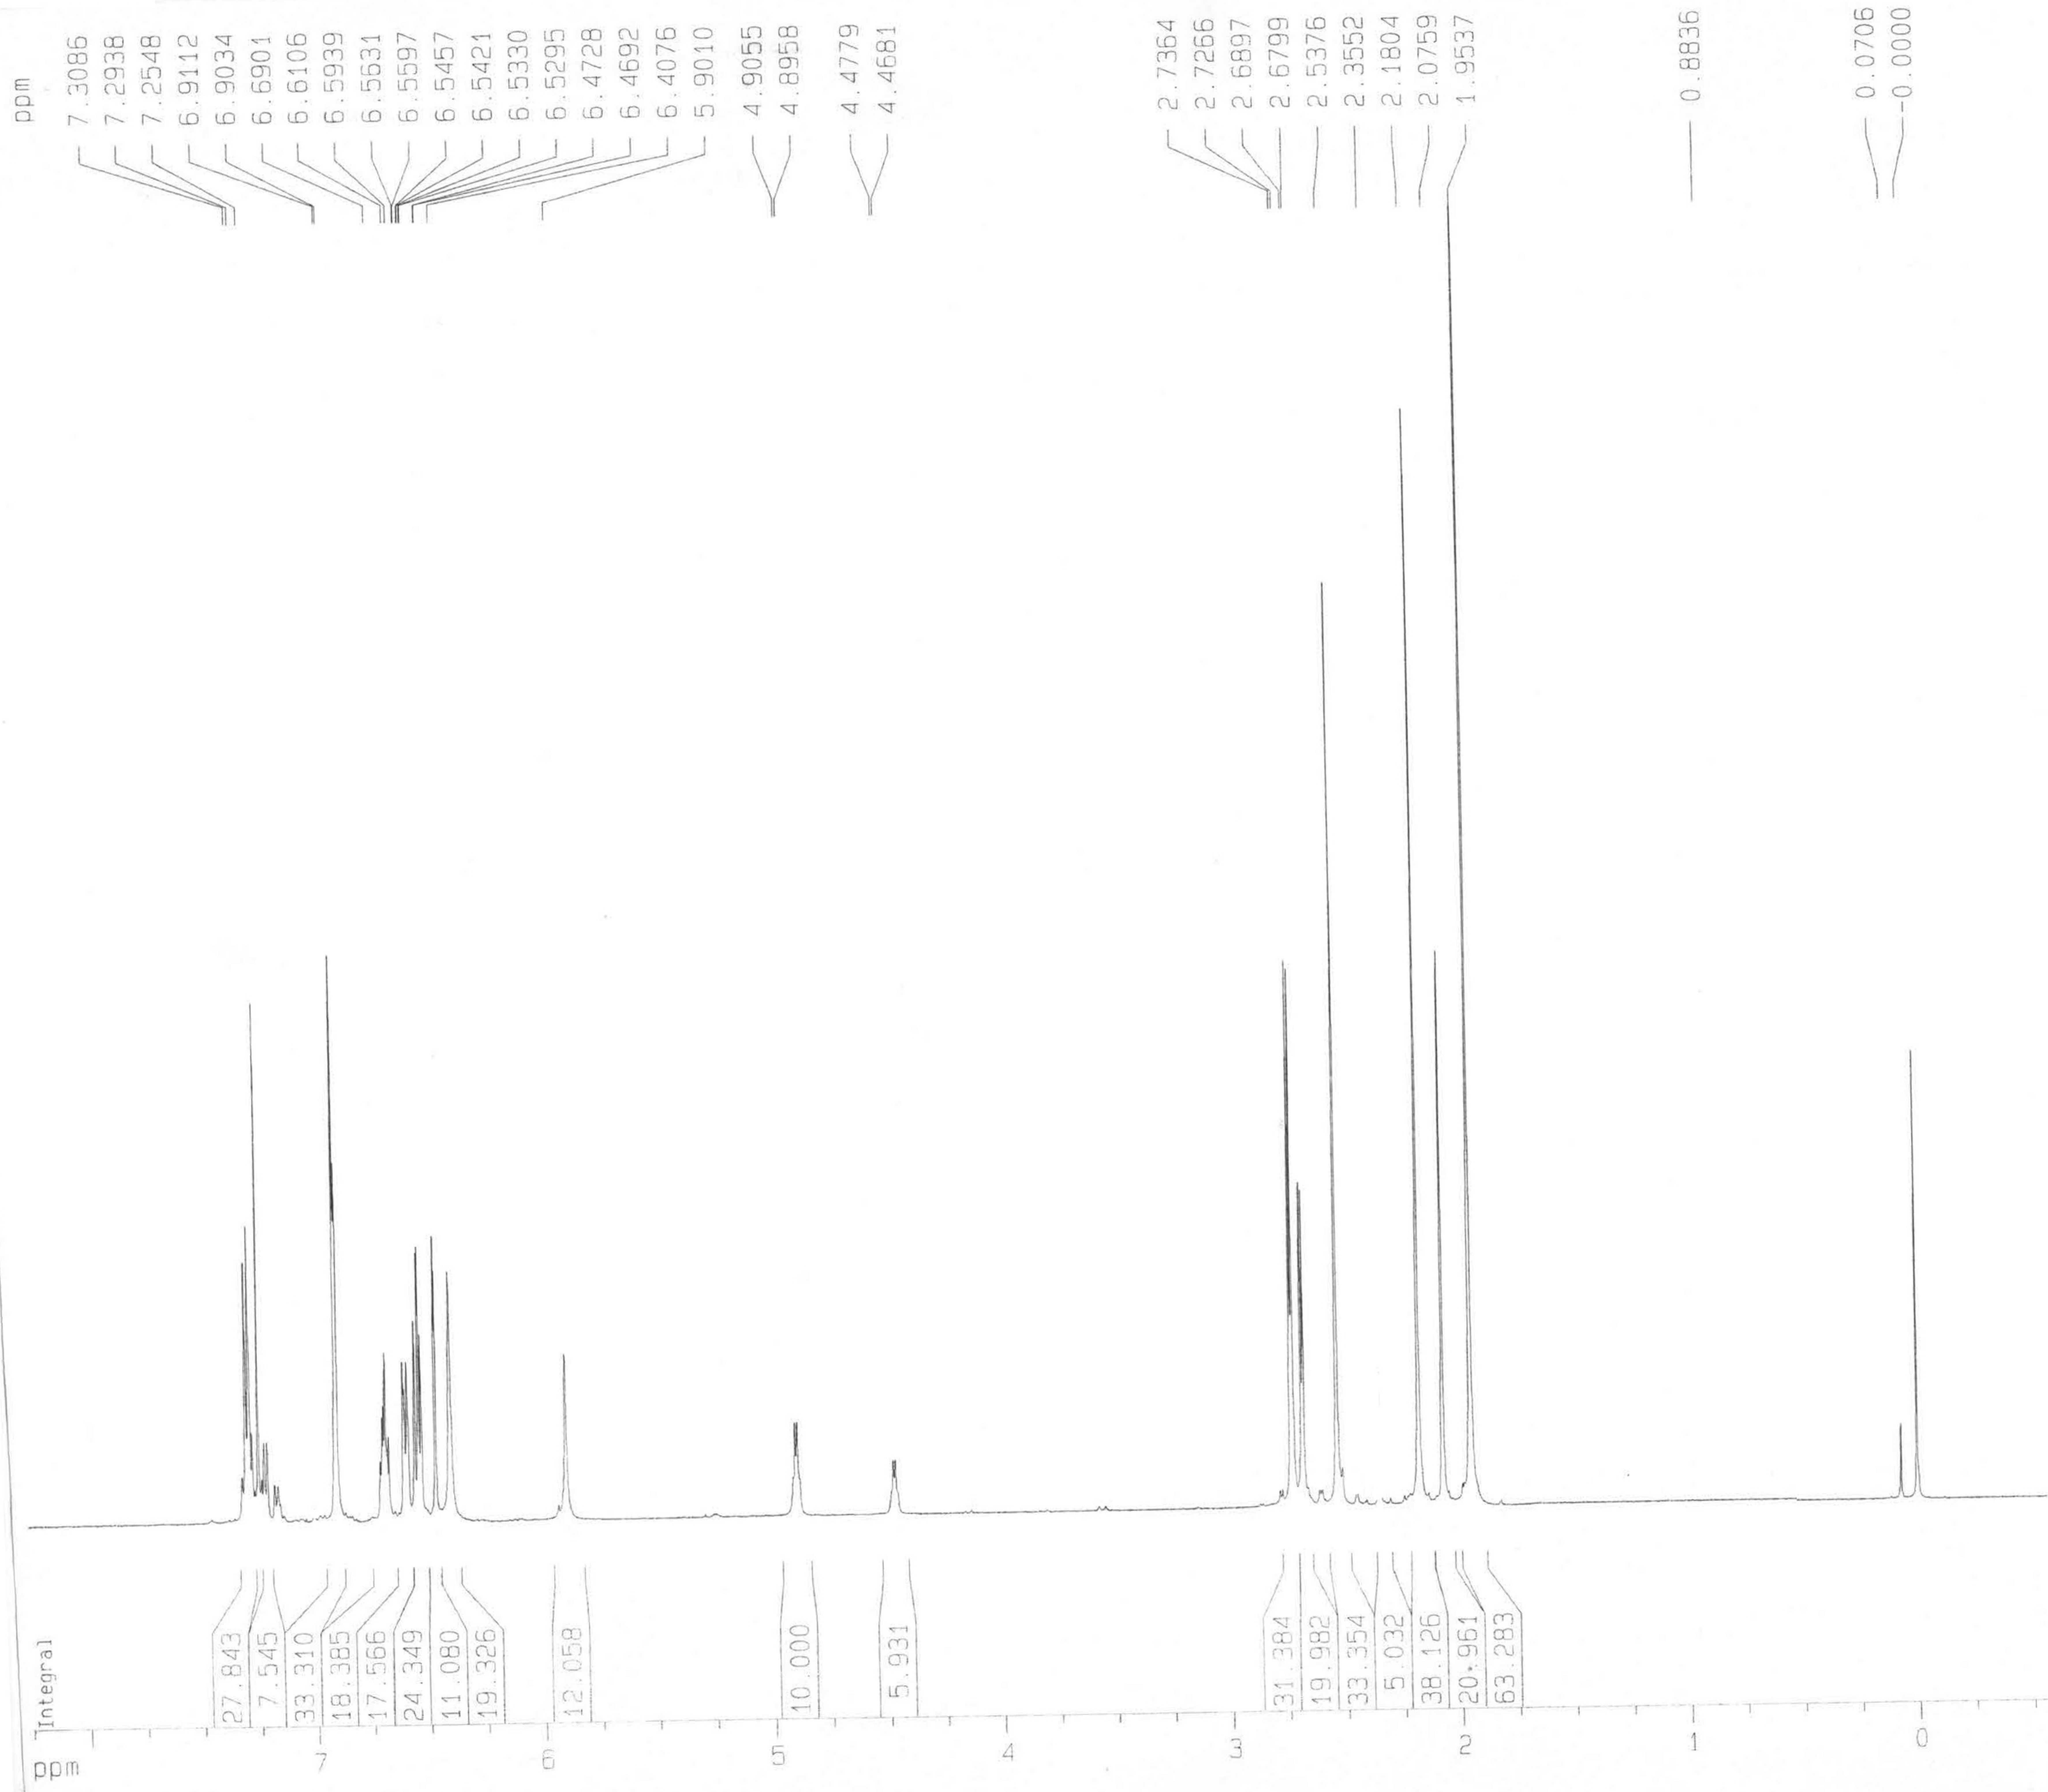

Current Data Parameters  
NAME servzhausen  
EXPNO 22  
PROCNO 1

F2 - Acquisition Parameters  
Date\_ 20110302  
Time 16.36  
INSTRUM dmx500  
PROBHD 5 mm QNP 1H/13  
PULPROG zg  
TD 32768  
SOLVENT CDC13  
NS 8  
DS 0  
SWH 8503.401 Hz  
FIDRES 0.259503 Hz  
AQ 1.9268672 sec  
RG 128  
DW 58.800 usec  
DE 6.00 usec  
TE 0.0 K  
D1 6.00000000 sec  
MCREST 0.00000000 sec  
MCWRK 0.01500000 sec

==== CHANNEL f1 =====  
NUC1 1H  
P1 8.00 usec  
PL1 3.00 dB  
SF01 500.1337409 MHz

F2 - Processing parameters  
SI 32768  
SF 500.1300166 MHz  
WDW no  
SSB 0  
LB 0.00 Hz  
GB 0  
PC 3.00

1D NMR plot parameters  
CX 22.00 cm  
CY 21.34 cm  
F1P 8.264 ppm  
F1 4133.24 Hz  
F2P -0.563 ppm  
F2 -281.33 Hz  
PPMCM 0.40122 ppm/cm  
HZCM 200.66211 Hz/cm

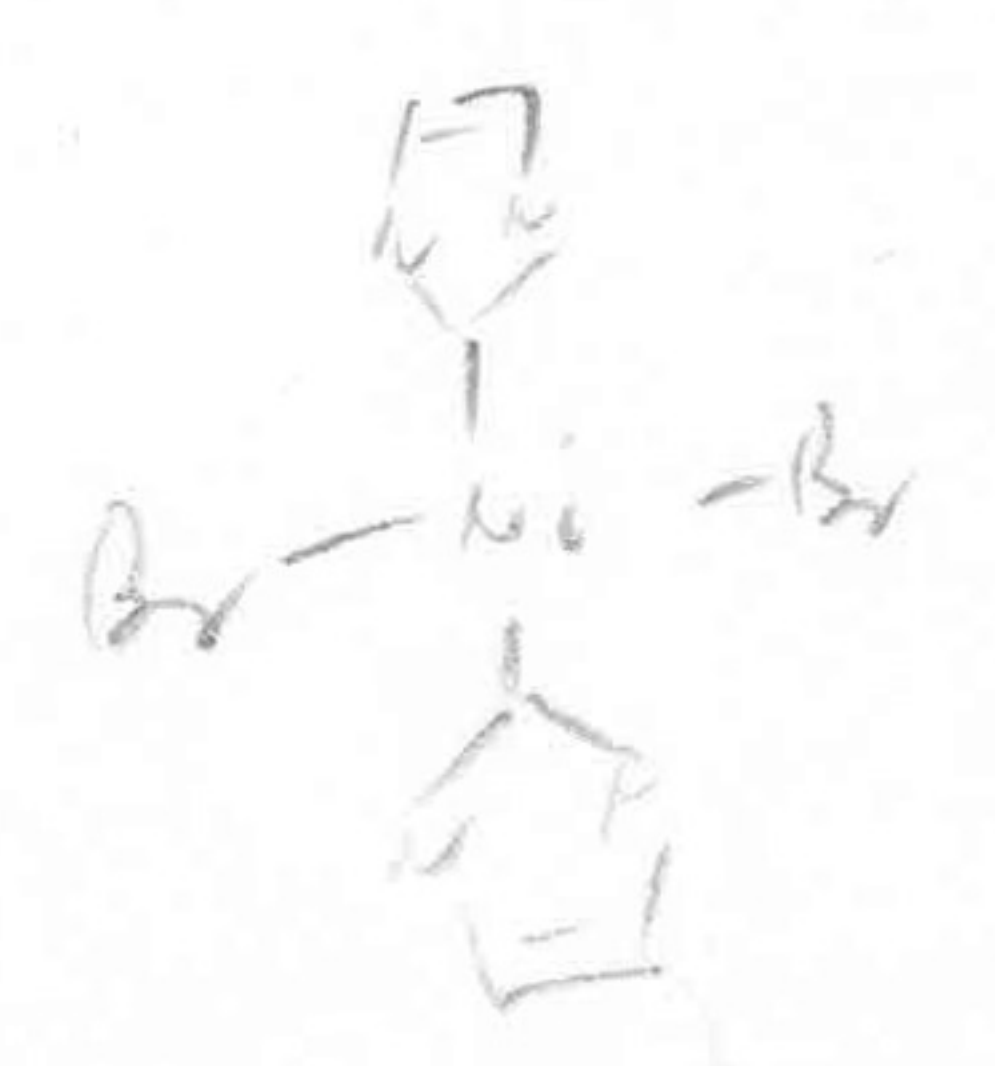



20120728-zhang-02-H-4.jdf  
liyinke/20120728-zhang-02-H

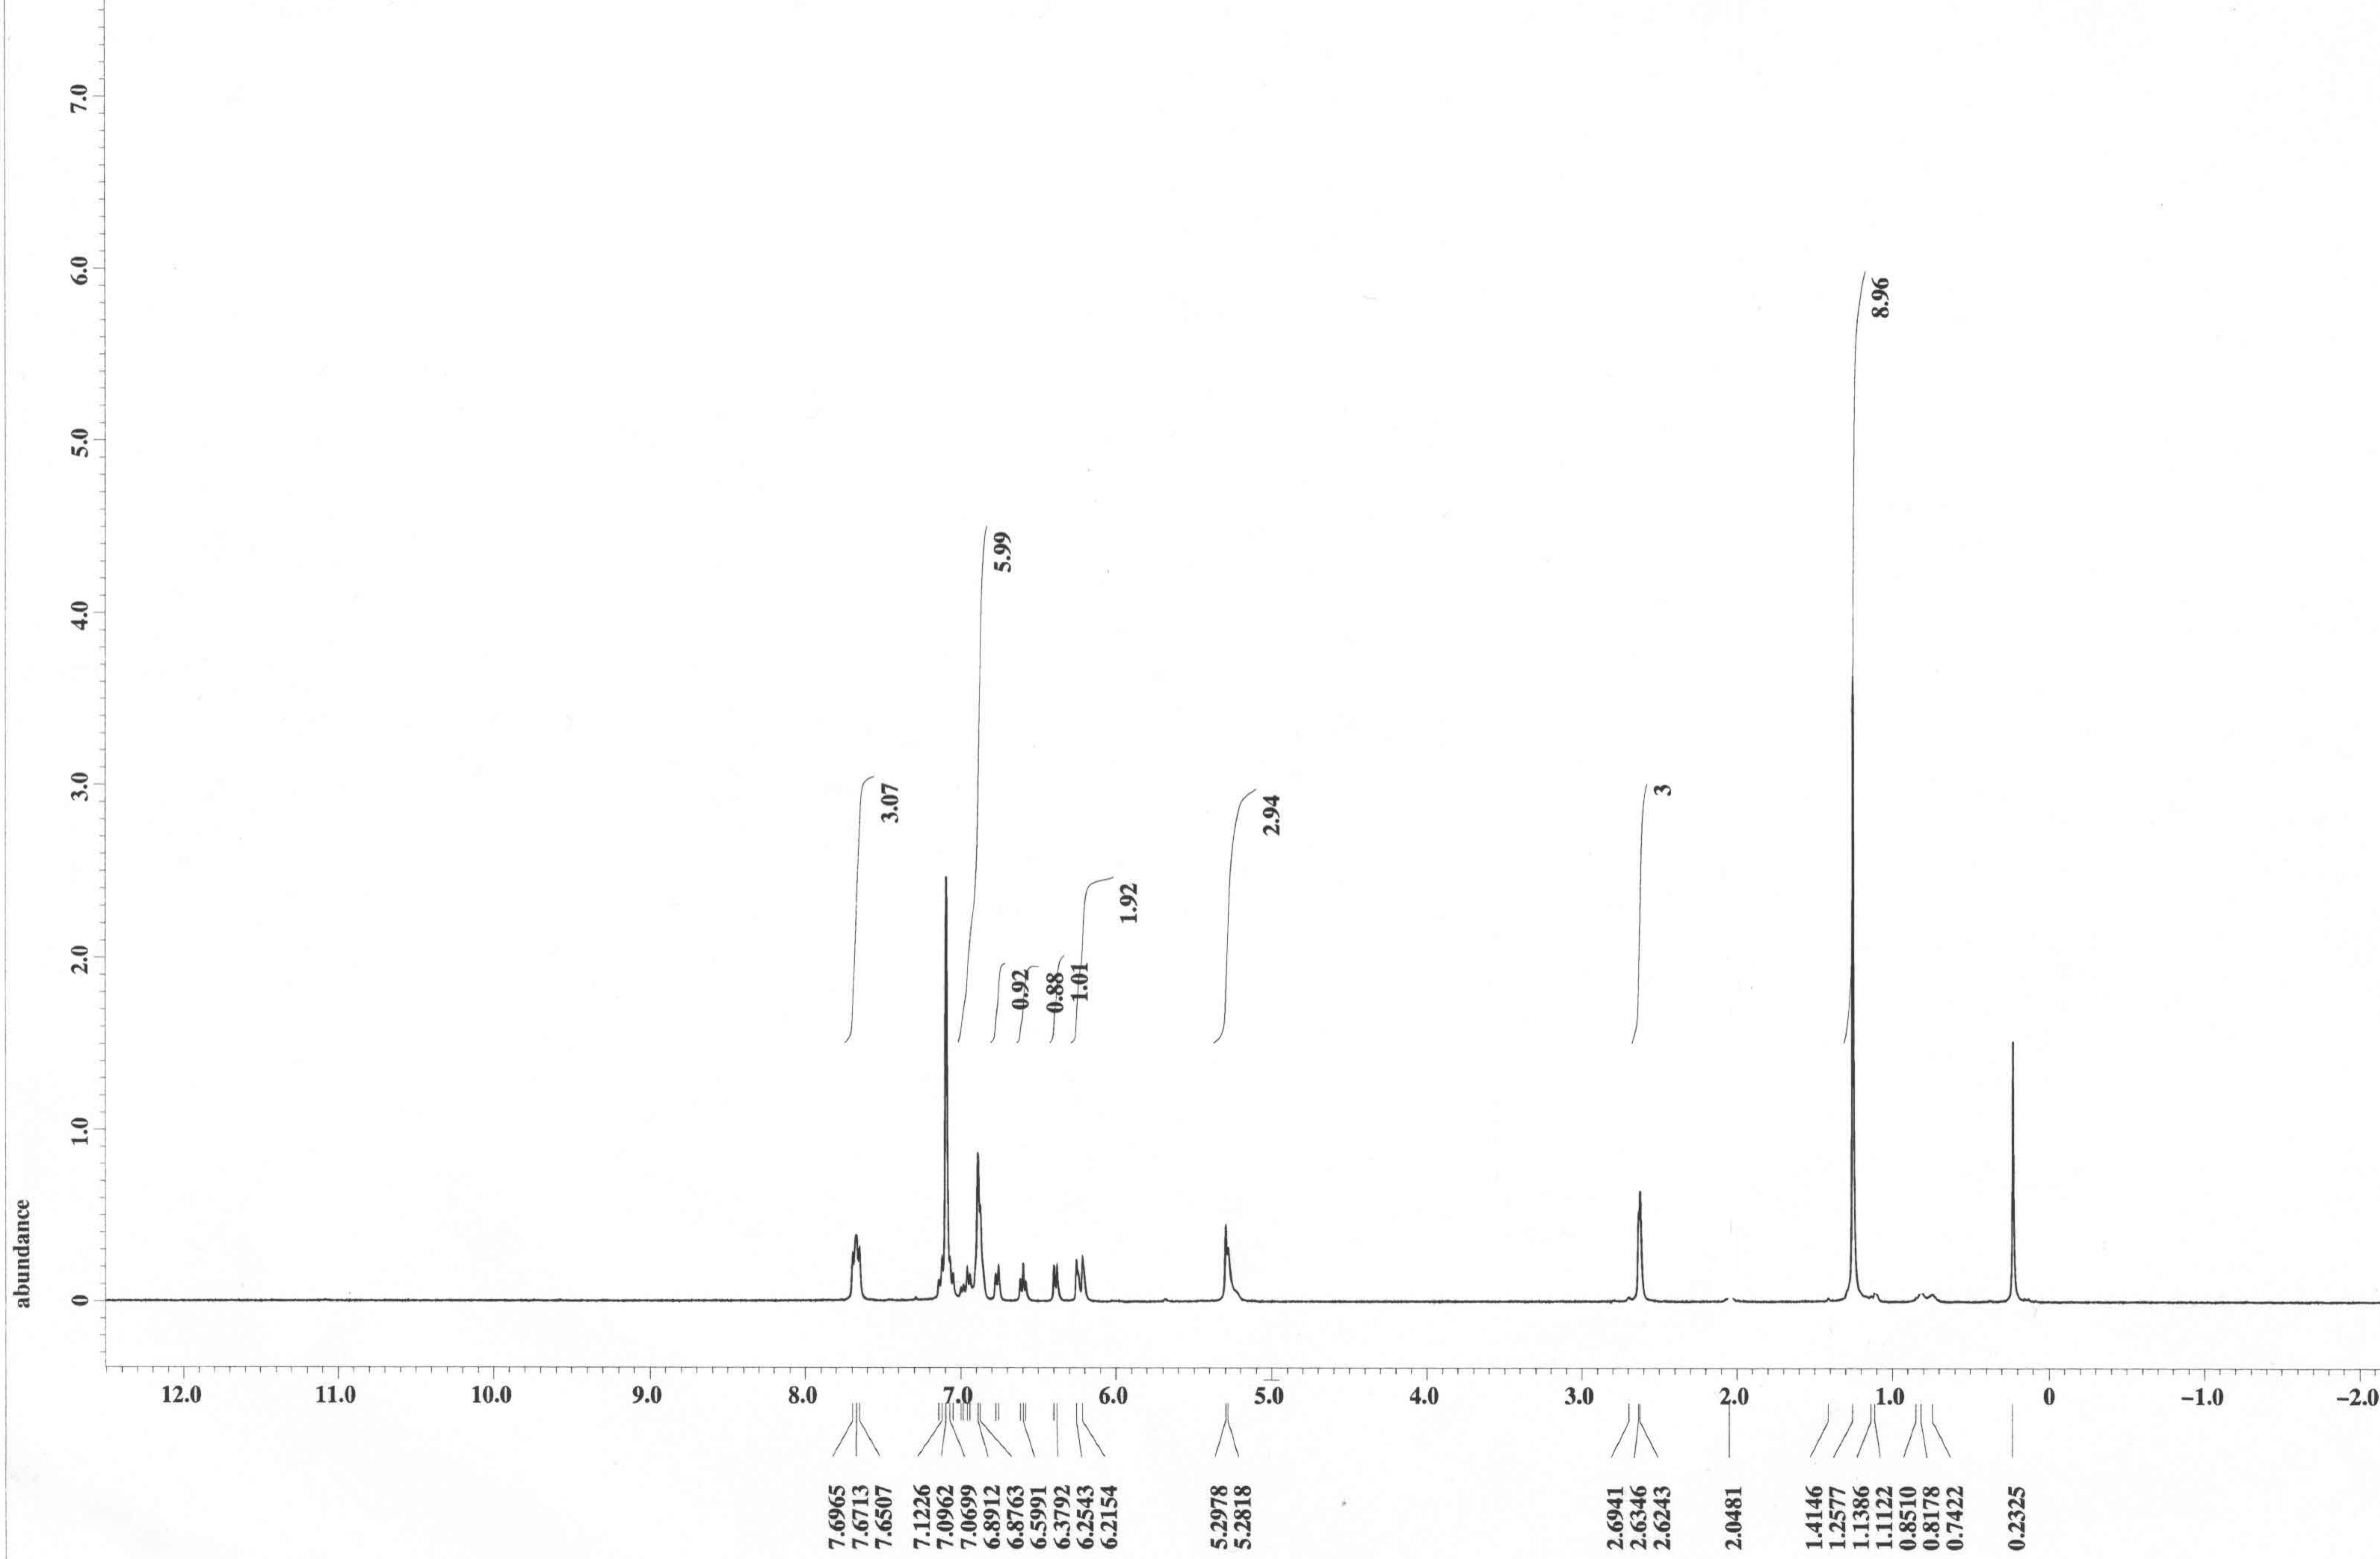

X : parts per Million : 1H



# Proton Standard

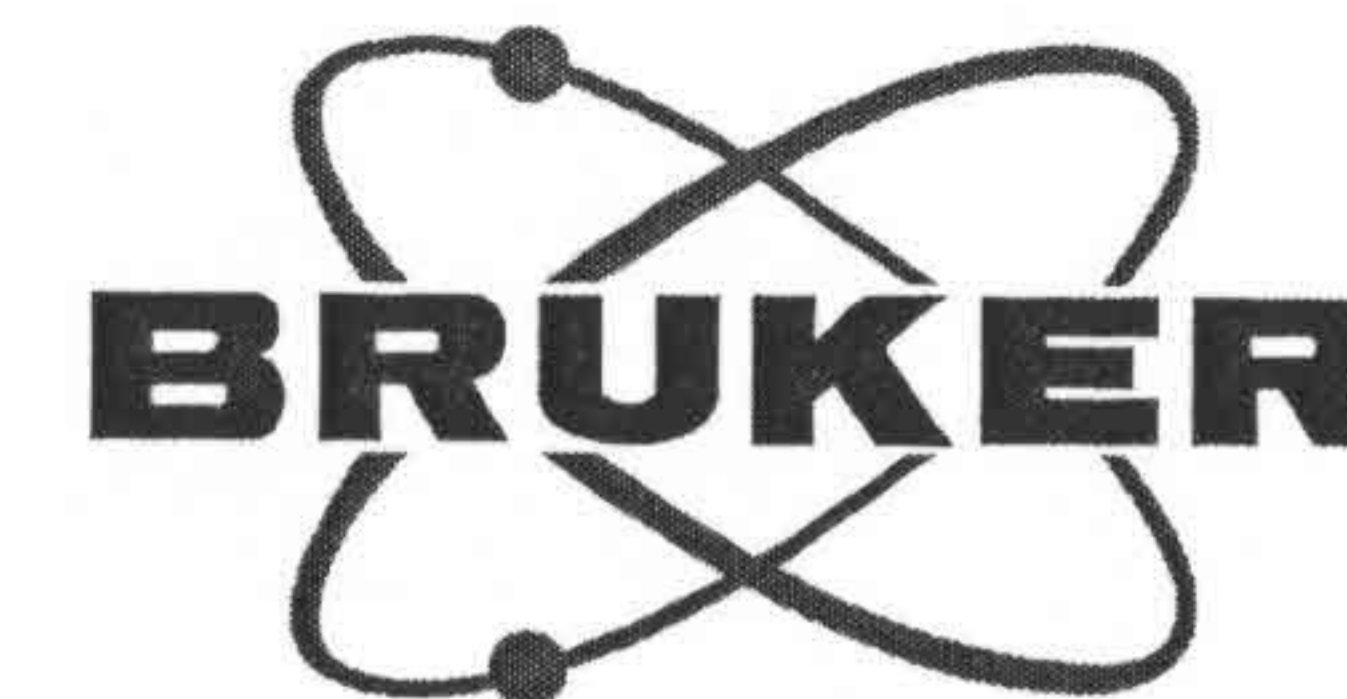

7.263  
7.172  
6.933  
6.851  
6.816  
6.675  
6.550  
5.970  
5.457  
5.074  
4.614  
3.479  
3.444  
2.717  
2.597  
2.548  
2.523  
2.445  
2.139  
2.092  
1.917  
1.585  
1.456  
0.073  
0.003

Current Data Parameters  
NAME liyinle  
EXPNO 2013013101  
PROCNO 1

F2 - Acquisition Parameters  
Date\_ 20130131  
Time\_ 9.25  
INSTRUM spect  
PROBHD 5 mm PABBO BB/  
PULPROG zg  
TD 32768  
SOLVENT CDCl3  
NS 4  
DS 0  
SWH 6393.862 Hz  
FIDRES 0.195125 Hz  
AQ 2.5624576 sec  
RG 51.14  
DW 78.200 usec  
DE 6.50 usec  
TE 293.4 K  
D1 6.00000000 sec  
TD0 1

==== CHANNEL f1 =====  
SFO1 399.7827985 MHz  
NUC1 1H  
P1 8.65 usec  
PLW1 35.97499847 W

F2 - Processing parameters  
SI 65536  
SF 399.7800095 MHz  
WDW EM  
SSB 0  
LB 0.30 Hz  
GB 0  
PC 10.00

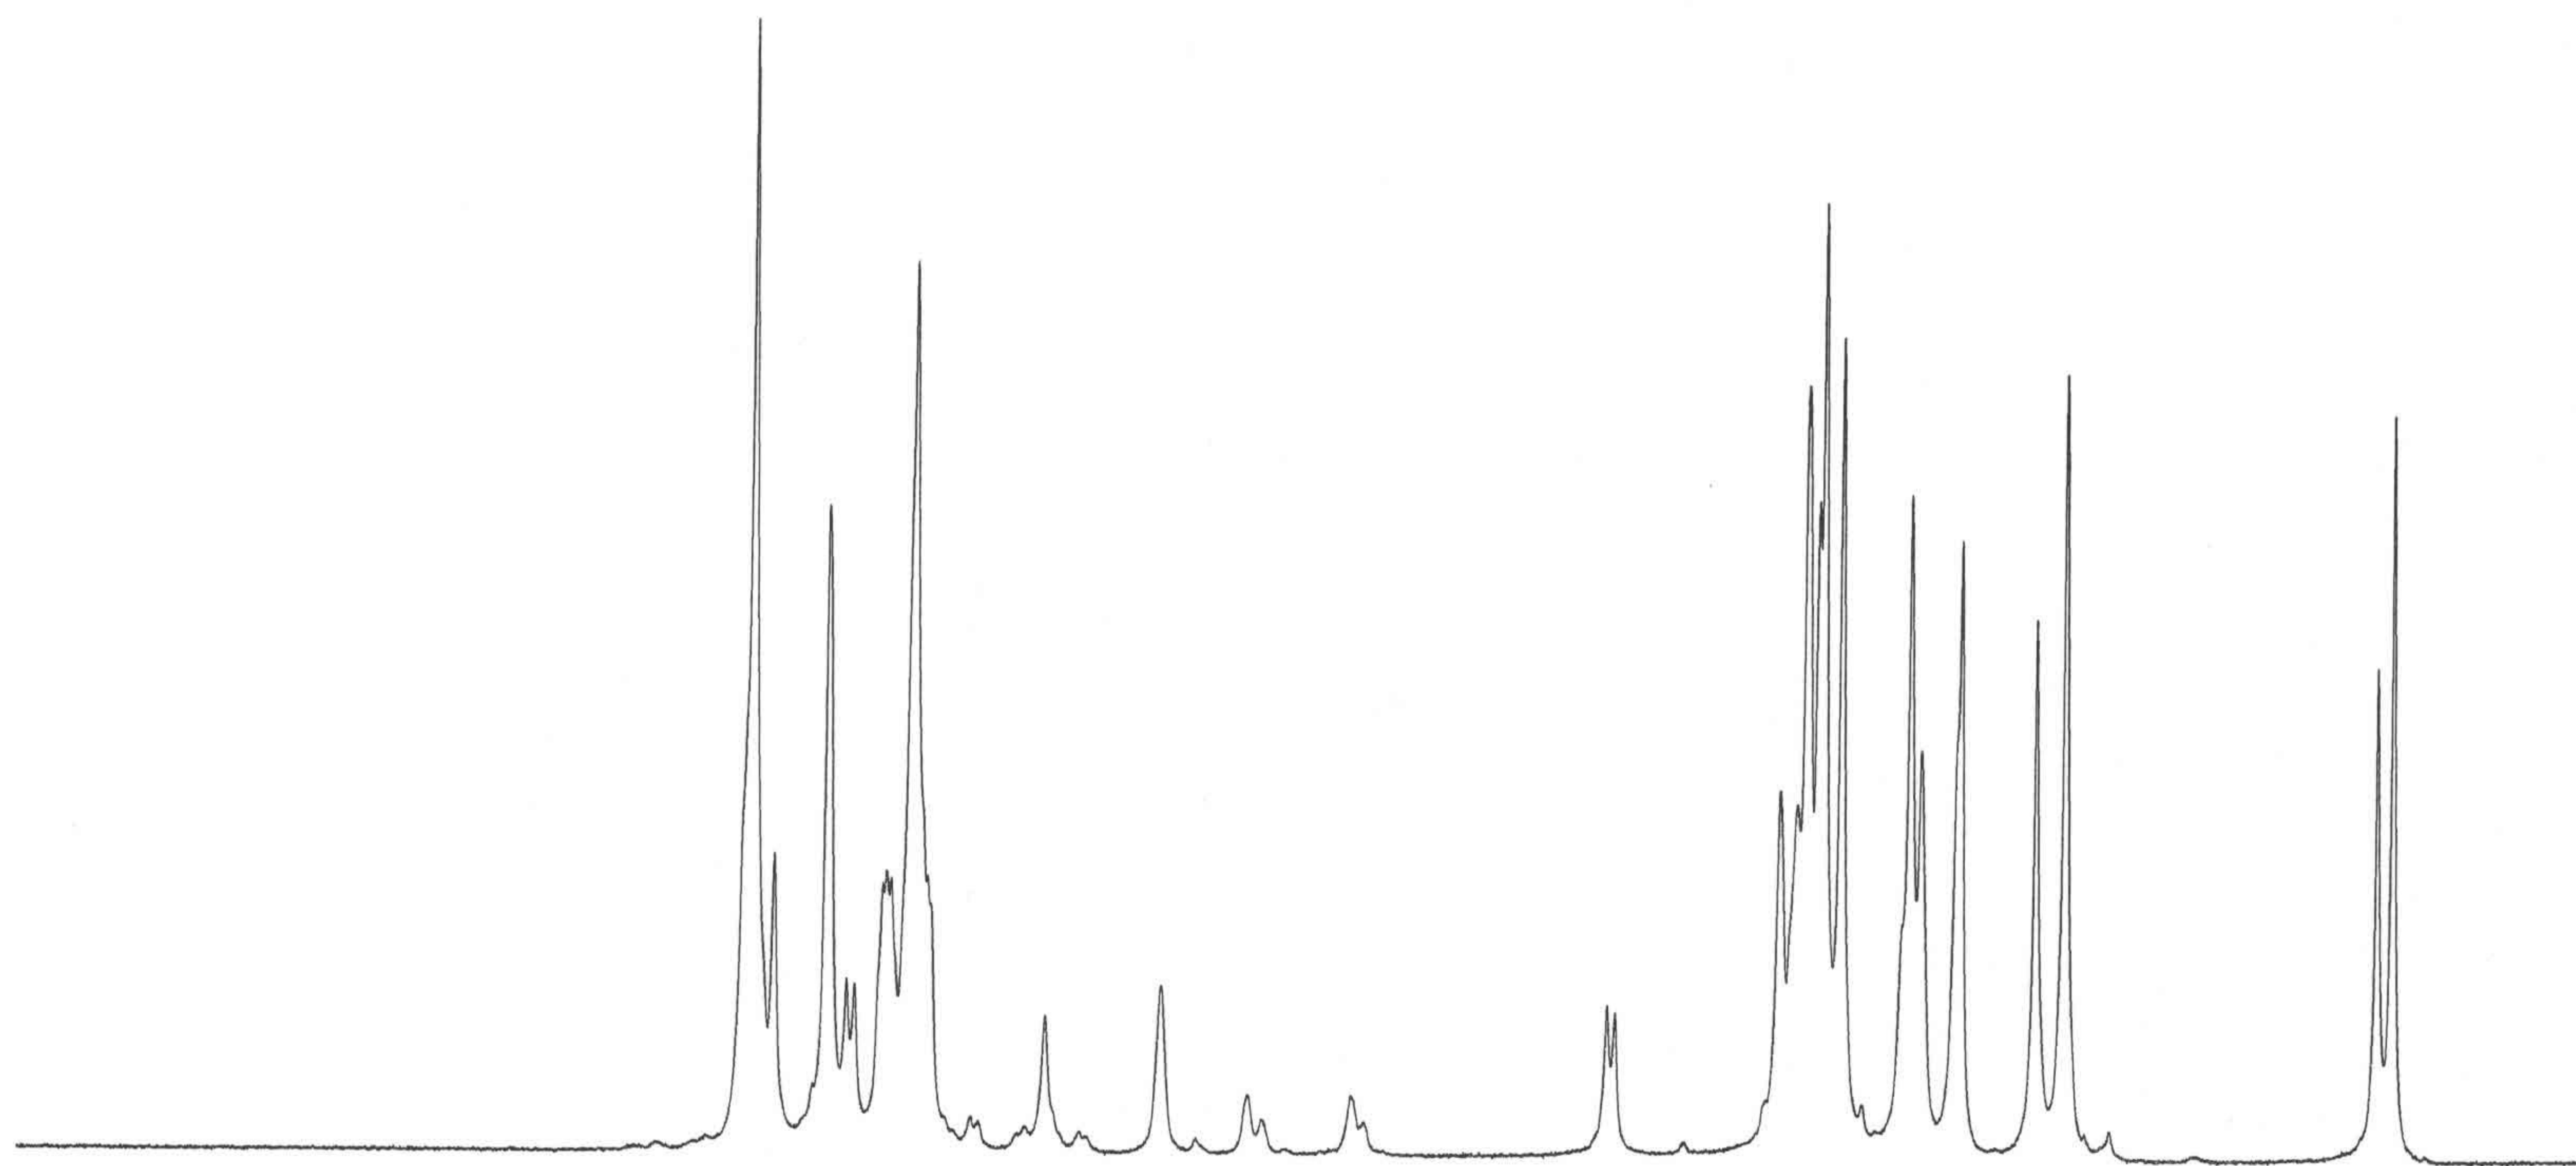

10 9 8 7 6 5 4 3 2 1 0 ppm

7.45  
4.26  
9.28  
0.92  
0.95  
0.45  
0.47  
1.00  
14.41  
4.86  
2.98  
5.00



20120720-zhang-3-H-4.jdf  
liylnle/20120720-zhang-3-H

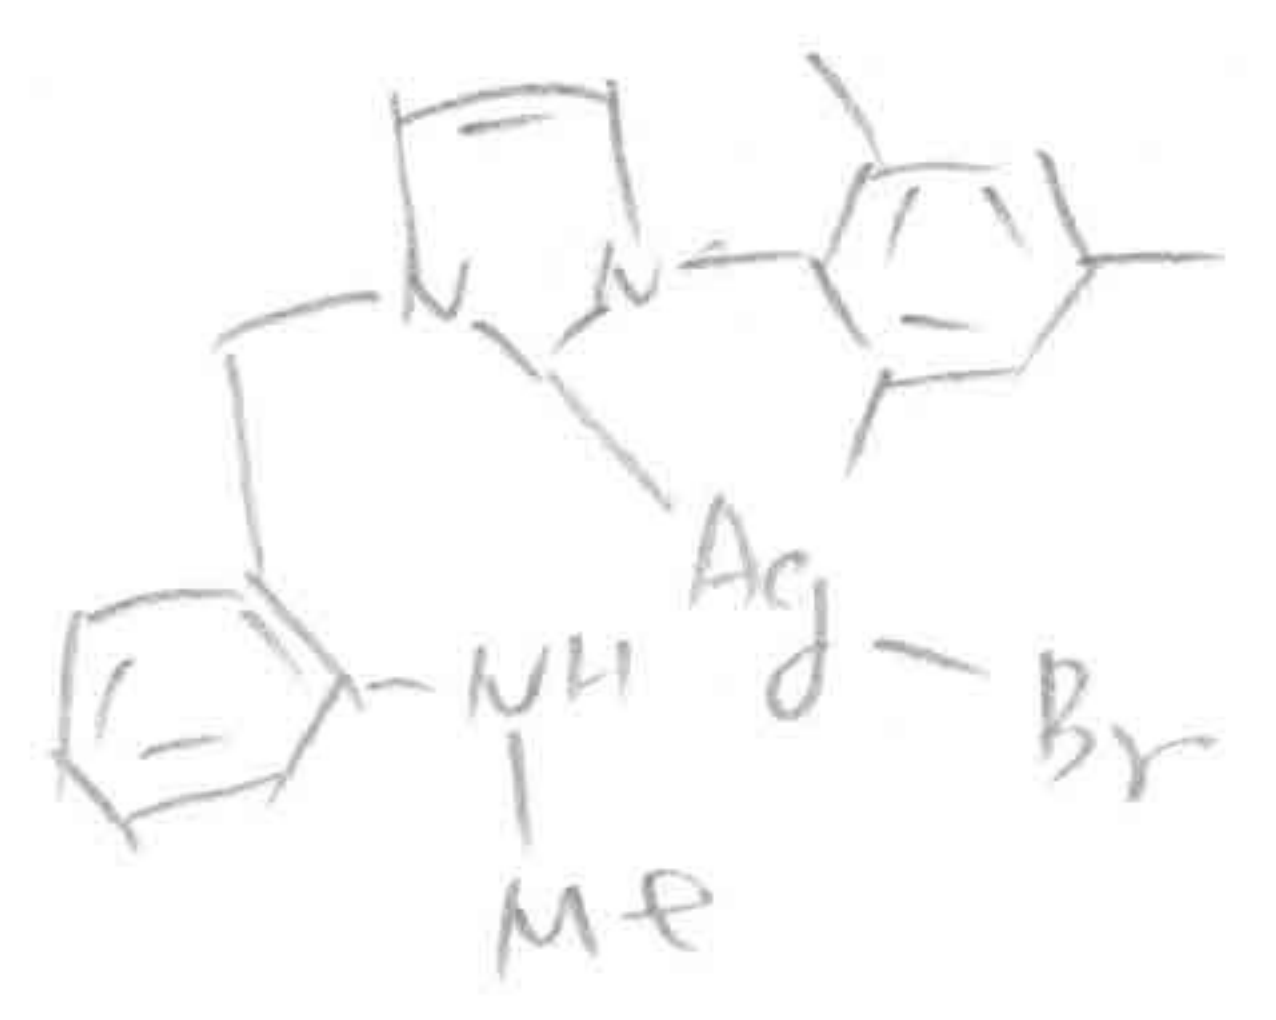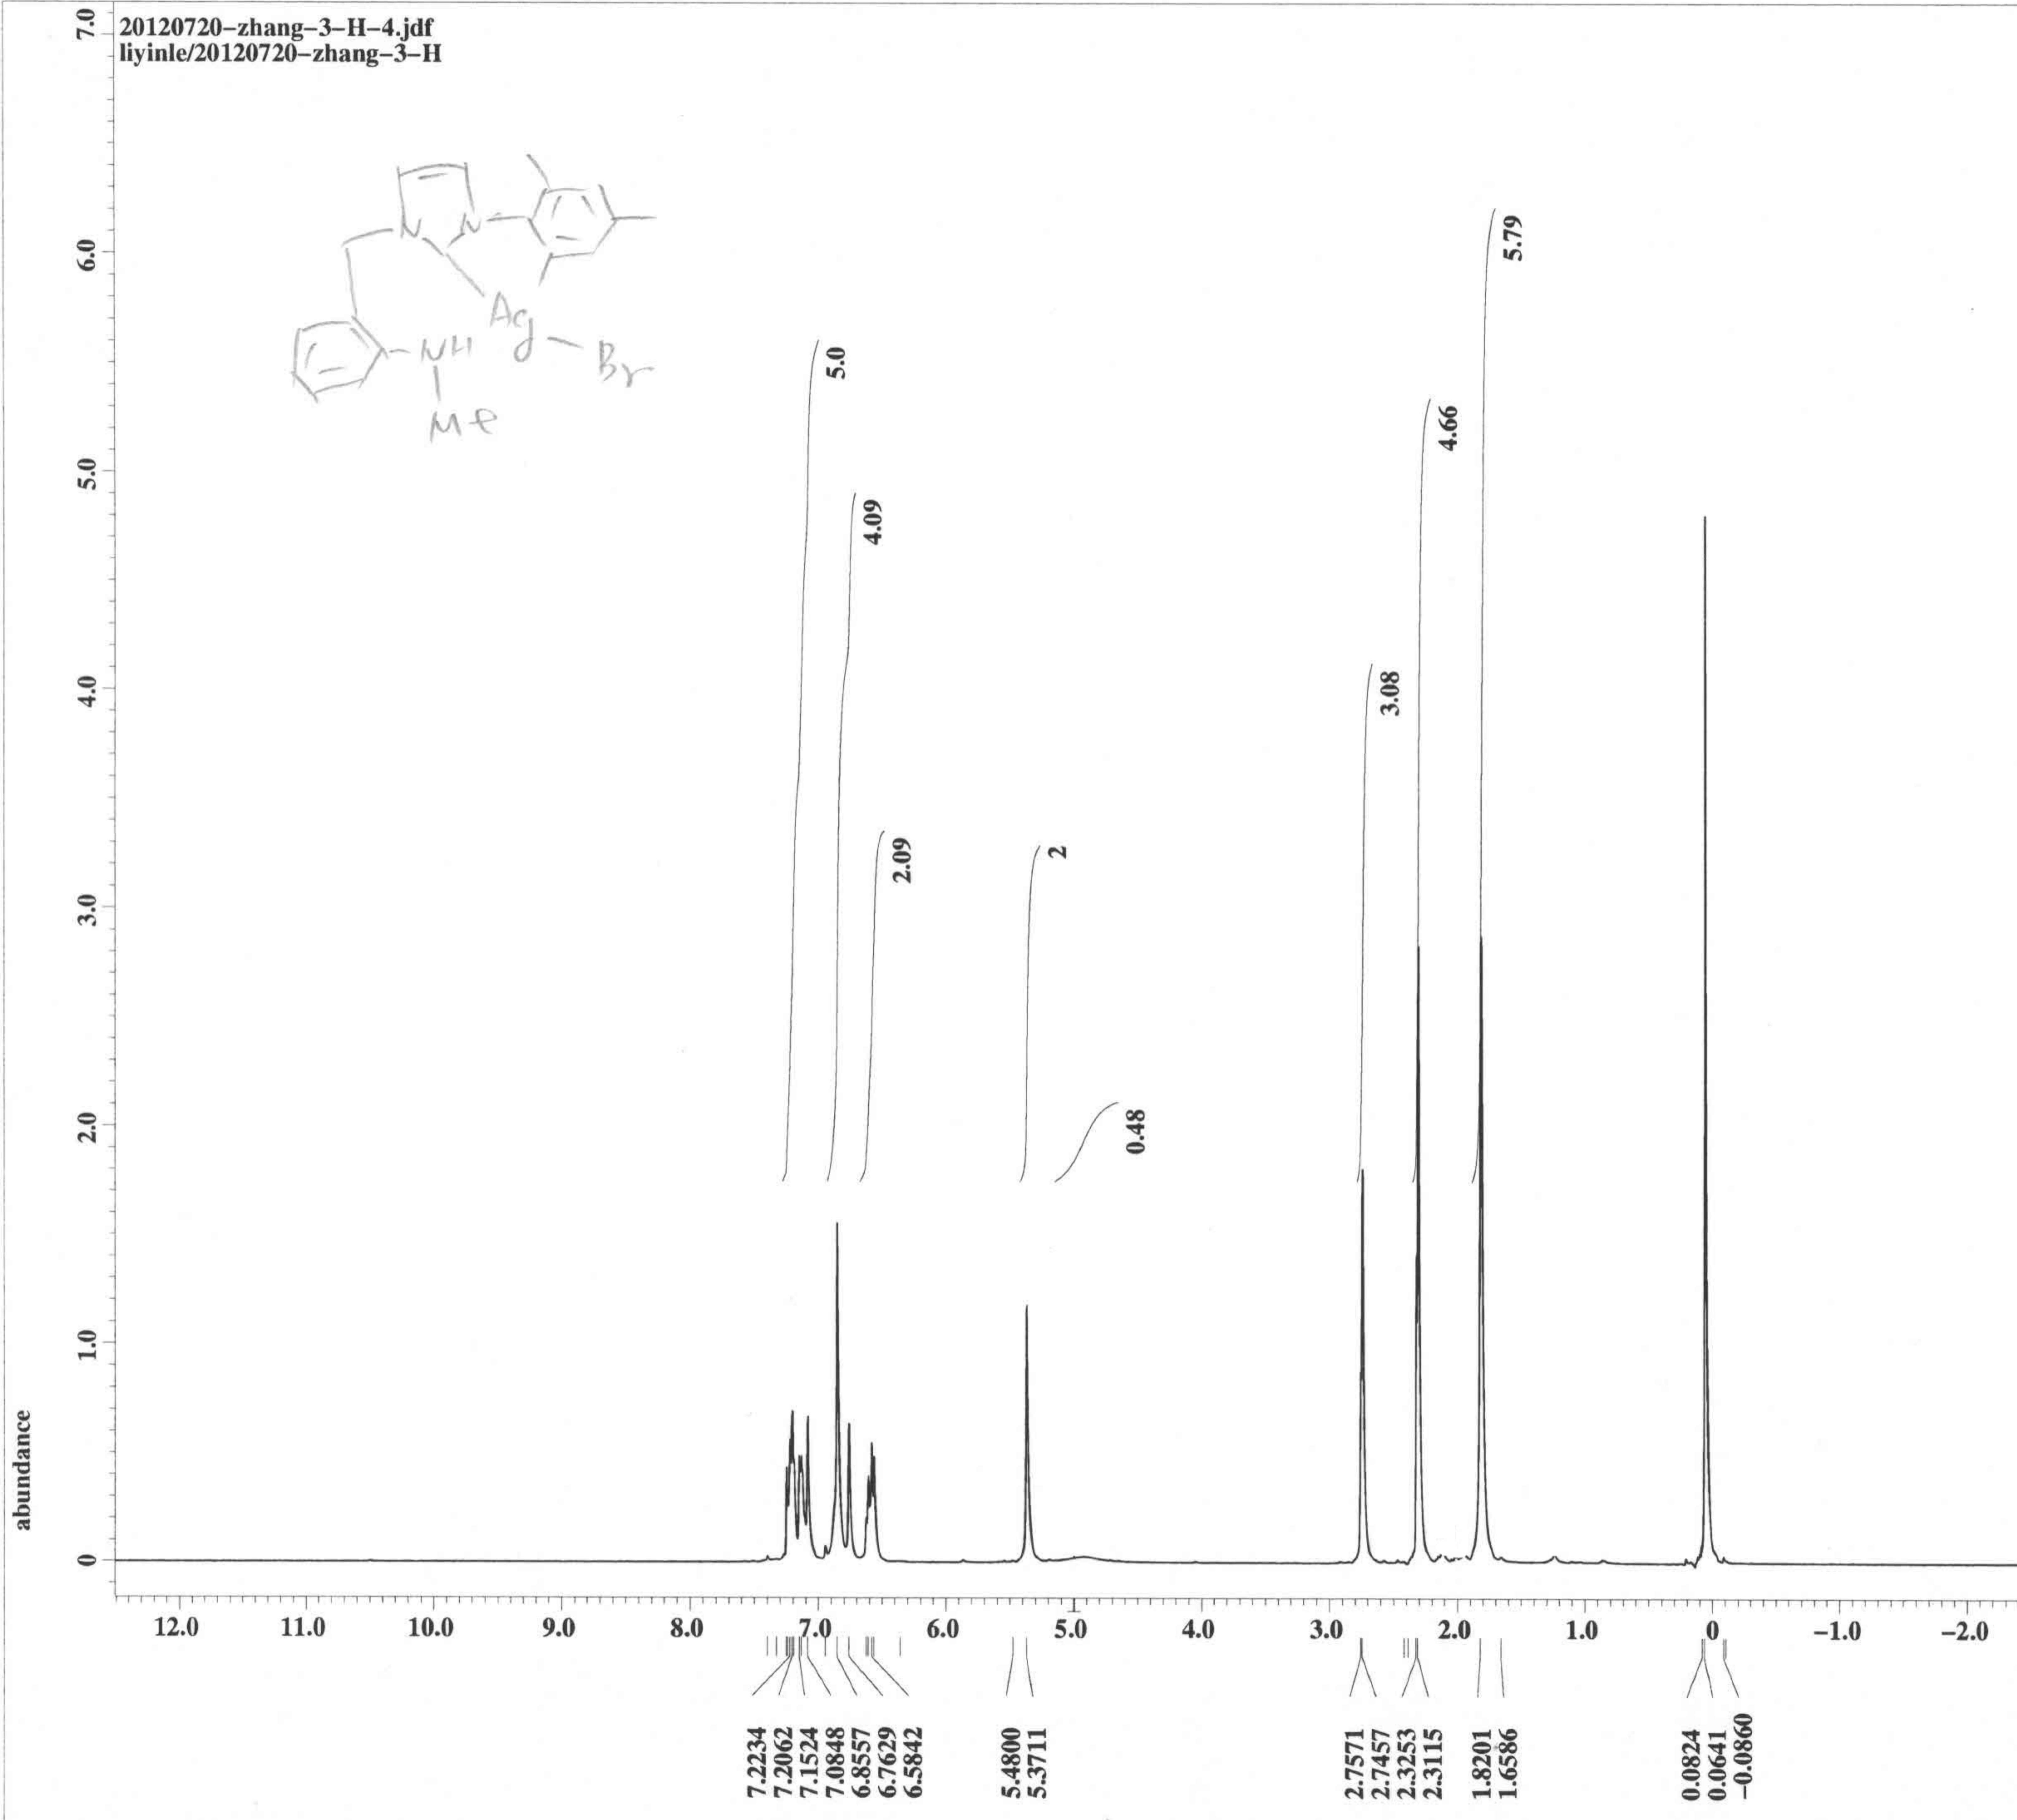

X : parts per Million : 1H

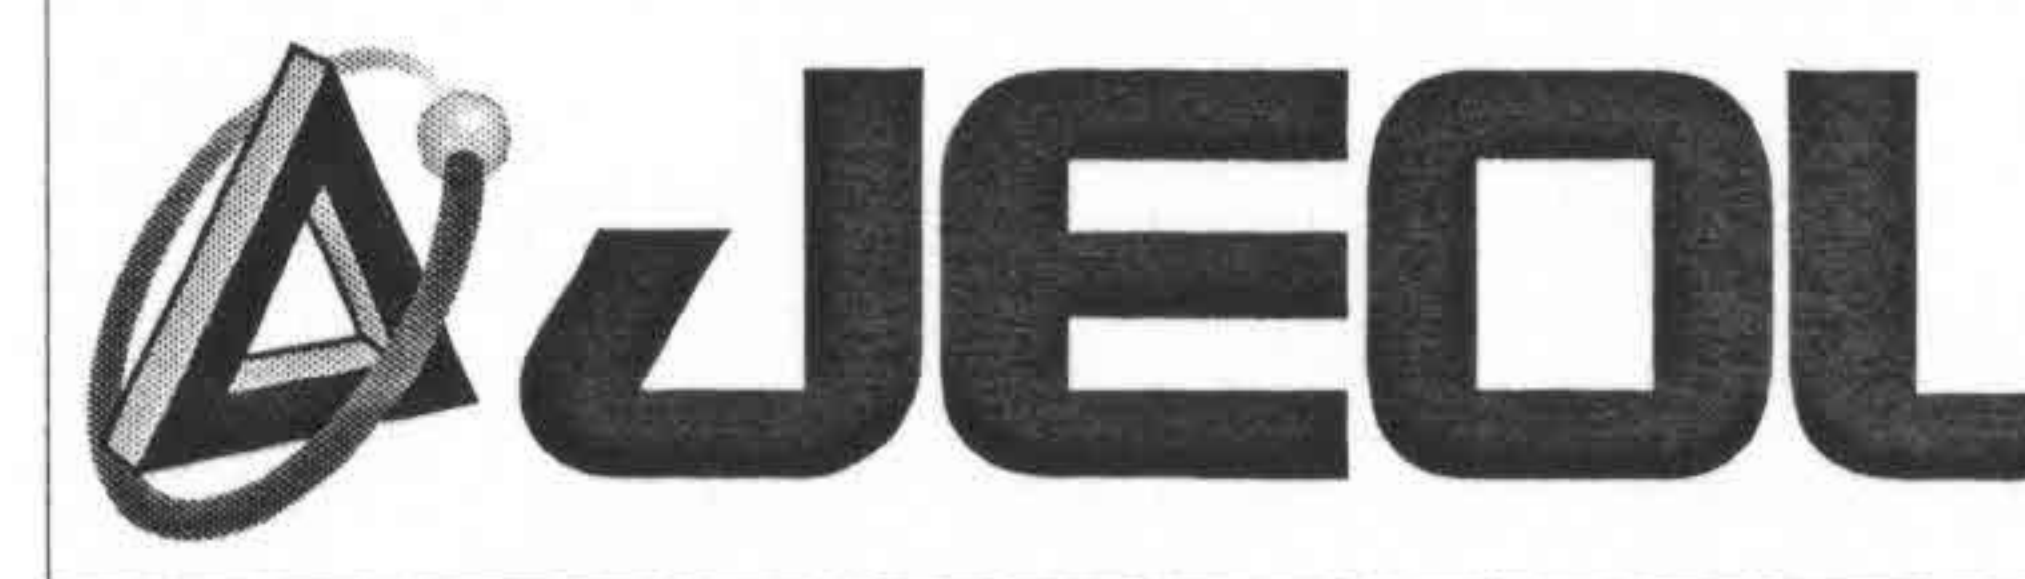

----- PROCESSING PARAMETERS -----  
 dc\_balance : 0 : FALSE  
 sexp : 0.2[Hz] : 0.0[s]  
 trapezoid3 : 0[%] : 80[%] : 100[%]  
 zerofill : 1  
 fft : 1 : TRUE : TRUE  
 ppm

Derived from: 20120720-zhang-3-H-1.jdf

Filename = 20120720-zhang-3-H-4.  
 Author = delta  
 Experiment = single\_pulse.ex2  
 Sample\_id = liylnle/20120720-zhan  
 Solvent = CHLOROFORM-D  
 Creation\_time = 20-JUL-2012 15:00:30  
 Revision\_time = 20-JUL-2012 15:24:36  
 Current\_time = 20-JUL-2012 15:28:44

Comment = liylnle/20120720-zhan  
 Data\_format = 1D COMPLEX  
 Dim\_size = 13107  
 Dim\_title = 1H  
 Dim\_units = [ppm]  
 Dimensions = X  
 Site = ECA400  
 Spectrometer = DELTA2\_NMR

Field\_strength = 9.389766[T] (400[MHz])  
 X\_acq\_duration = 2.18365952[s]  
 X\_domain = 1H  
 X\_freq = 399.78219838[MHz]  
 X\_offset = 5[ppm]  
 X\_points = 16384  
 X\_prescans = 1  
 X\_resolution = 0.45794685[Hz]  
 X\_sweep = 7.5030012[kHz]  
 Irr\_domain = 1H  
 Irr\_freq = 399.78219838[MHz]  
 Irr\_offset = 5[ppm]  
 Tri\_domain = 1H  
 Tri\_freq = 399.78219838[MHz]  
 Tri\_offset = 5[ppm]  
 Clipped = FALSE  
 Mod\_return = 1  
 Scans = 8  
 Total\_scans = 8

X\_90\_width = 10.6[us]  
 X\_acq\_time = 2.18365952[s]  
 X\_angle = 45[deg]  
 X\_atn = 4.5[dB]  
 X\_pulse = 5.3[us]  
 Irr\_mode = Off  
 Tri\_mode = Off  
 Dante\_presat = FALSE  
 Initial\_wait = 1[s]  
 Recvr\_gain = 30  
 Relaxation\_delay = 5[s]  
 Repetition\_time = 7.18365952[s]  
 Temp\_get = 23.7[dc]



20120721-zhang-1-H-6.jdf  
liyine/20120721-zhang-1

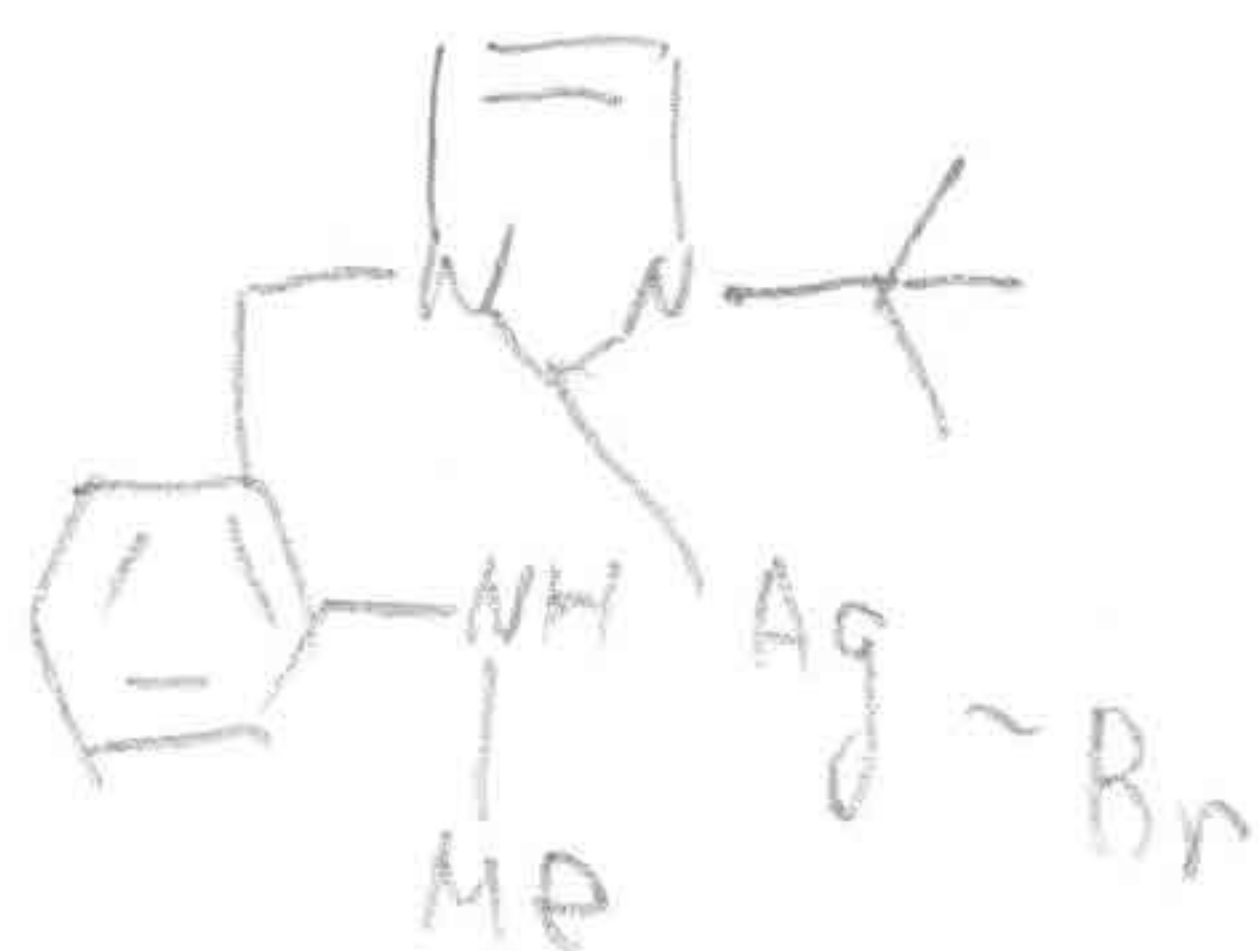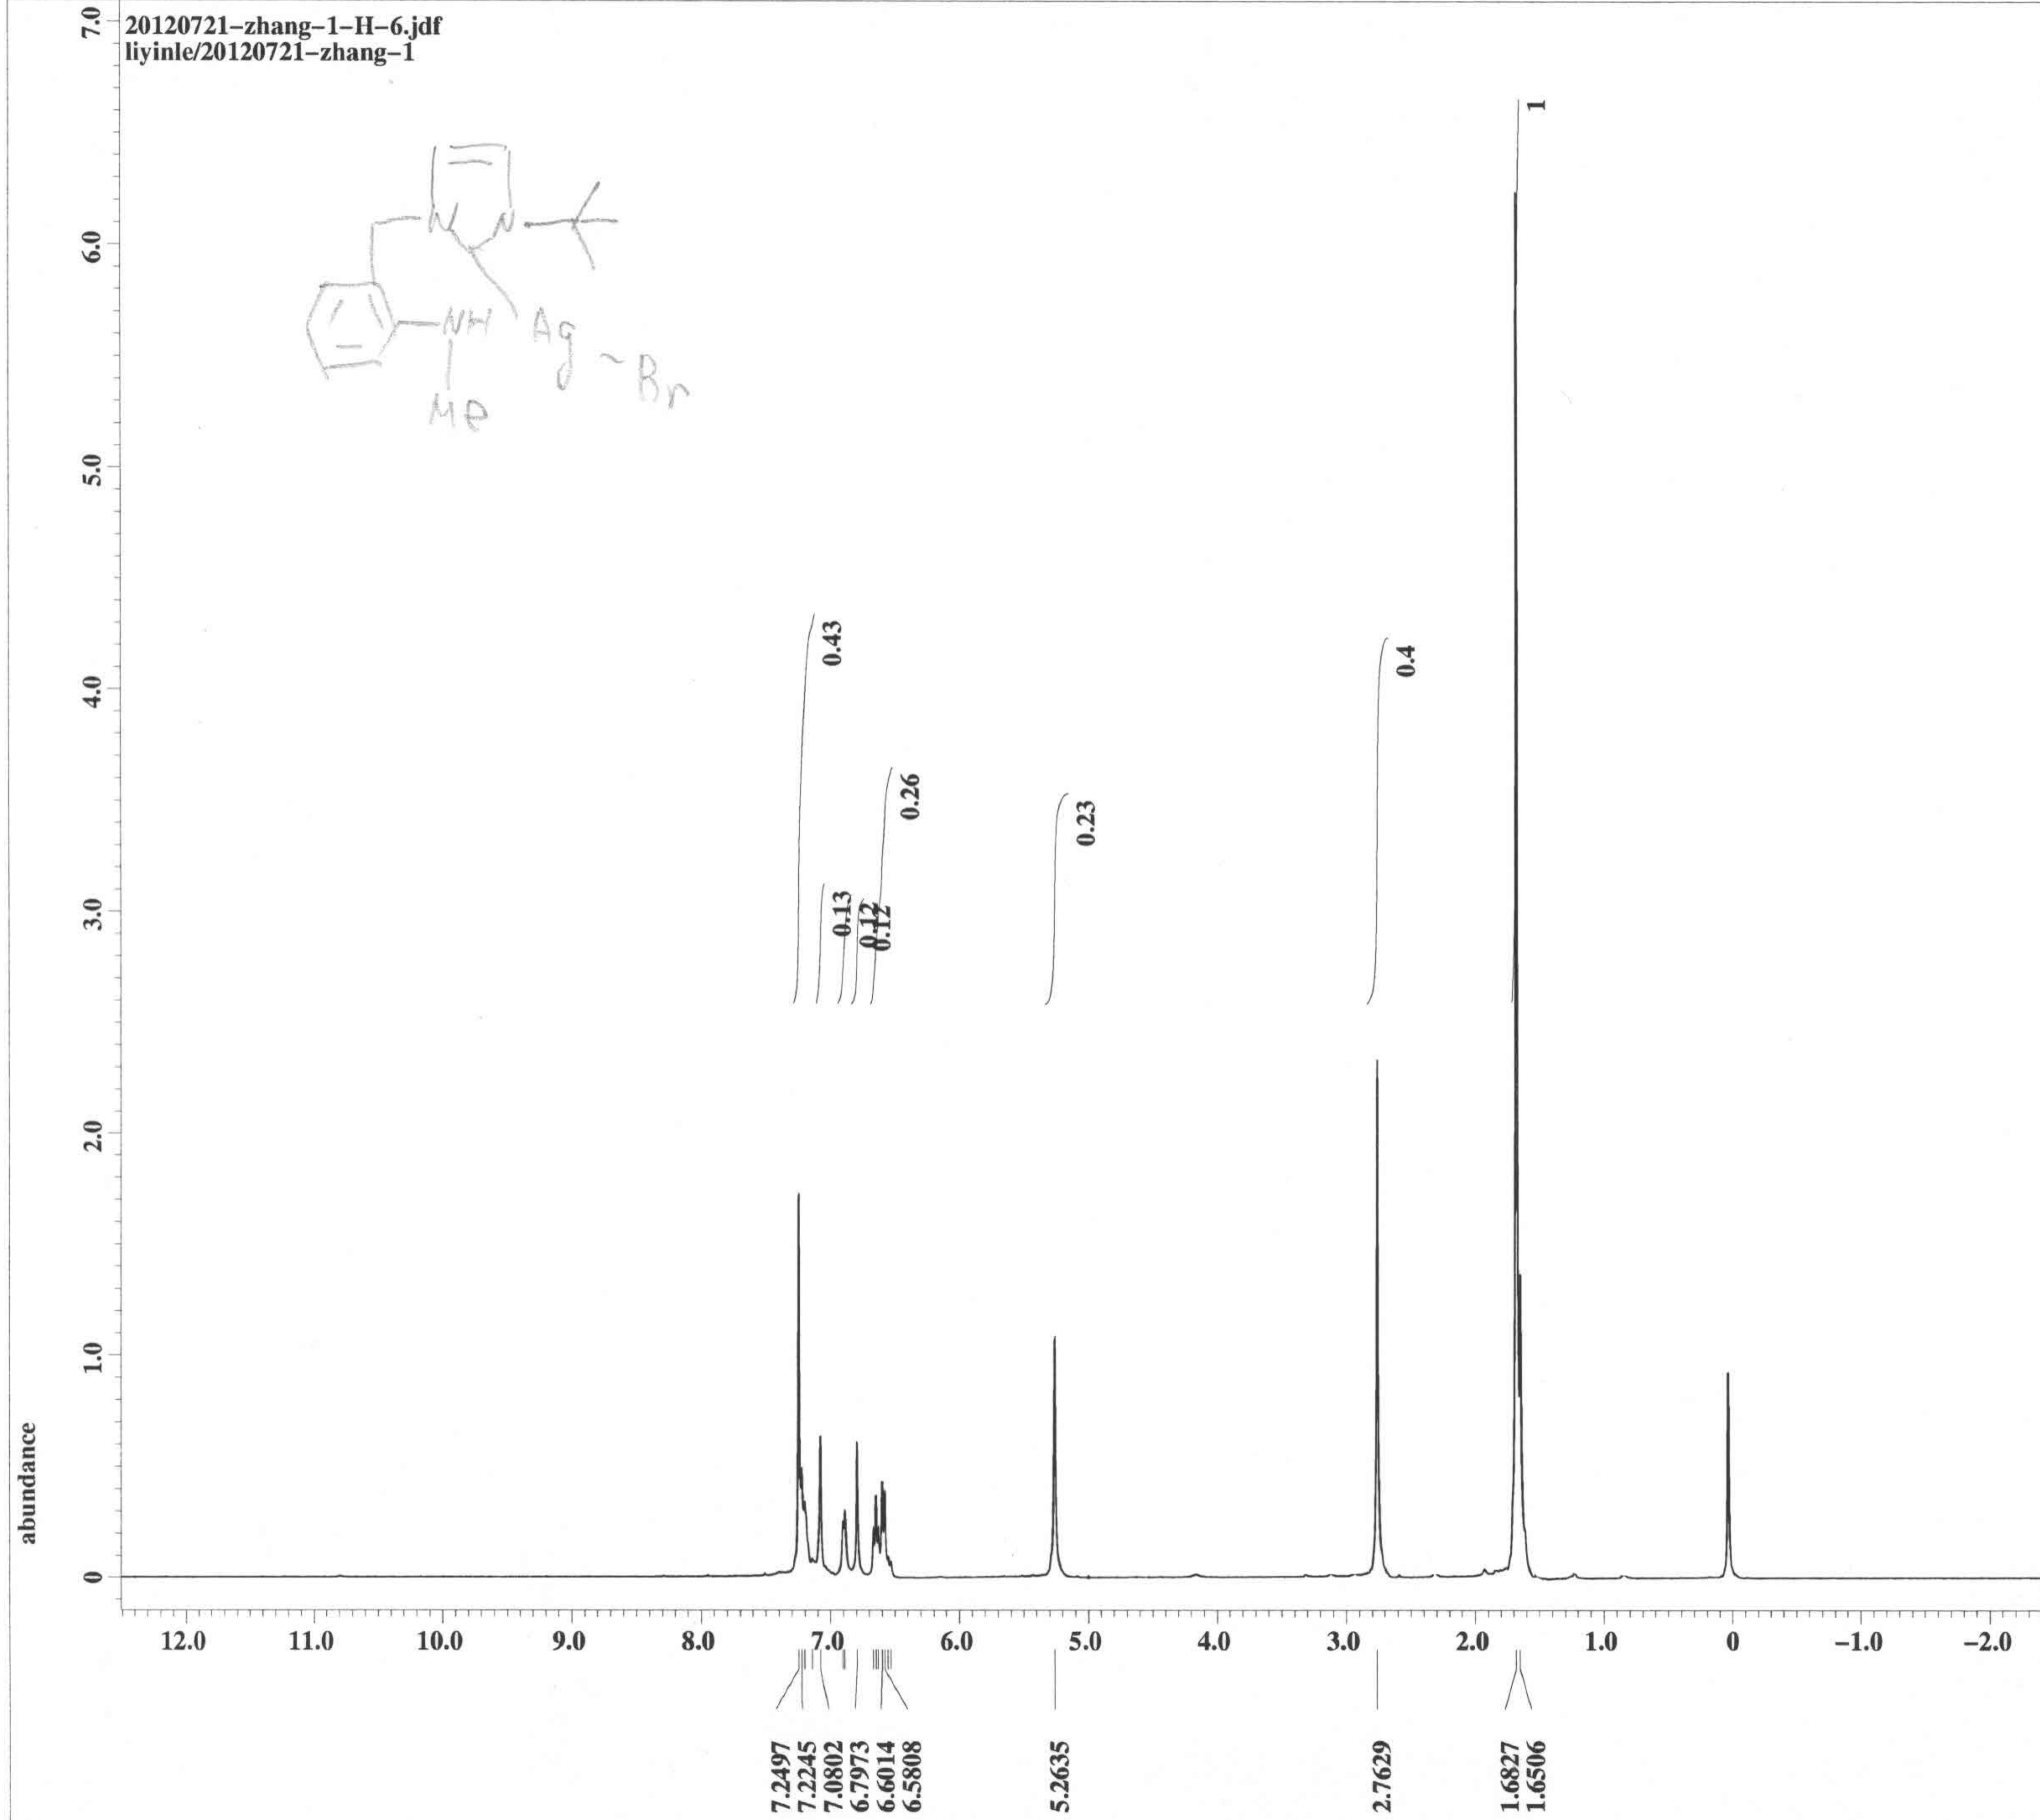

X : parts per Million : 1H

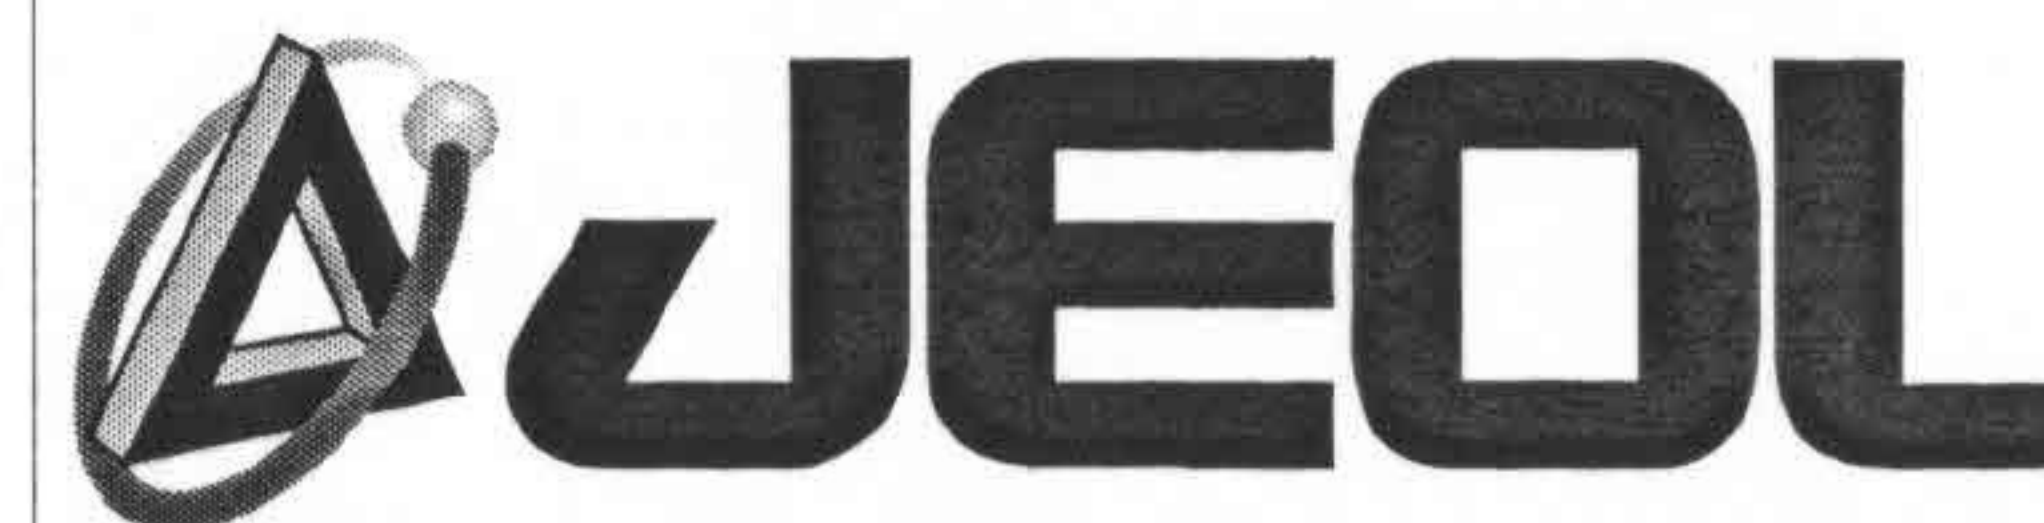

---- PROCESSING PARAMETERS ----

dc\_balance : 0 : FALSE  
sexp : 0.2[Hz] : 0.0[s]  
trapezoid3 : 0[%] : 80[%] : 100[%]  
zerofill : 1  
fft : 1 : TRUE : TRUE  
ppm

Filename = 20120721-zhang-1-H-6.  
Author = delta  
Experiment = single\_pulse.ex2  
Sample\_id = liyine/20120721-zhan  
Solvent = CHLOROFORM-D  
Creation\_time = 21-JUL-2012 12:58:08  
Revision\_time = 25-JUL-2012 11:02:46  
Current\_time = 25-JUL-2012 11:02:57

Comment = liyine/20120721-zhan  
Data\_format = 1D COMPLEX  
Dim\_size = 13107  
Dim\_title = 1H  
Dim\_units = [ppm]  
Dimensions = X  
Site = ECA400  
Spectrometer = DELTA2\_NMR

Field\_strength = 9.389766[T] (400[MHz])  
X\_acq\_duration = 2.18365952[s]  
X\_domain = 1H  
X\_freq = 399.78219838[MHz]  
X\_offset = 5[ppm]  
X\_points = 16384  
X\_prescans = 1  
X\_resolution = 0.45794685[Hz]  
X\_sweep = 7.5030012[kHz]  
Irr\_domain = 1H  
Irr\_freq = 399.78219838[MHz]  
Irr\_offset = 5[ppm]  
Tri\_domain = 1H  
Tri\_freq = 399.78219838[MHz]  
Tri\_offset = 5[ppm]  
Clipped = FALSE  
Mod\_return = 1  
Scans = 8  
Total\_scans = 8

X\_90\_width = 10.6[us]  
X\_acq\_time = 2.18365952[s]  
X\_angle = 45[deg]  
X\_atn = 4.5[dB]  
X\_pulse = 5.3[us]  
Irr\_mode = Off  
Tri\_mode = Off  
Dante\_preset = FALSE  
Initial\_wait = 1[s]  
Recvr\_gain = 38  
Relaxation\_delay = 5[s]  
Repetition\_time = 7.18365952[s]  
Temp\_get = 23.9[dc]



Proton Standard

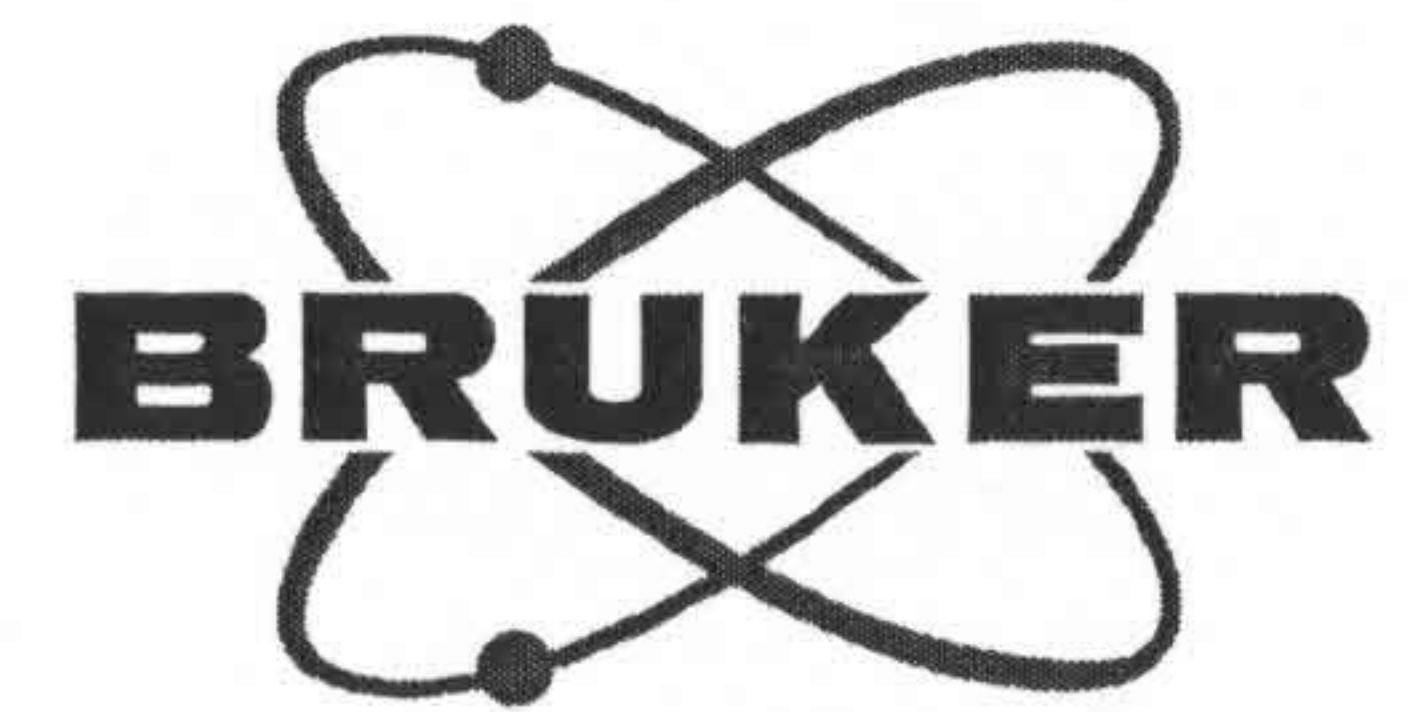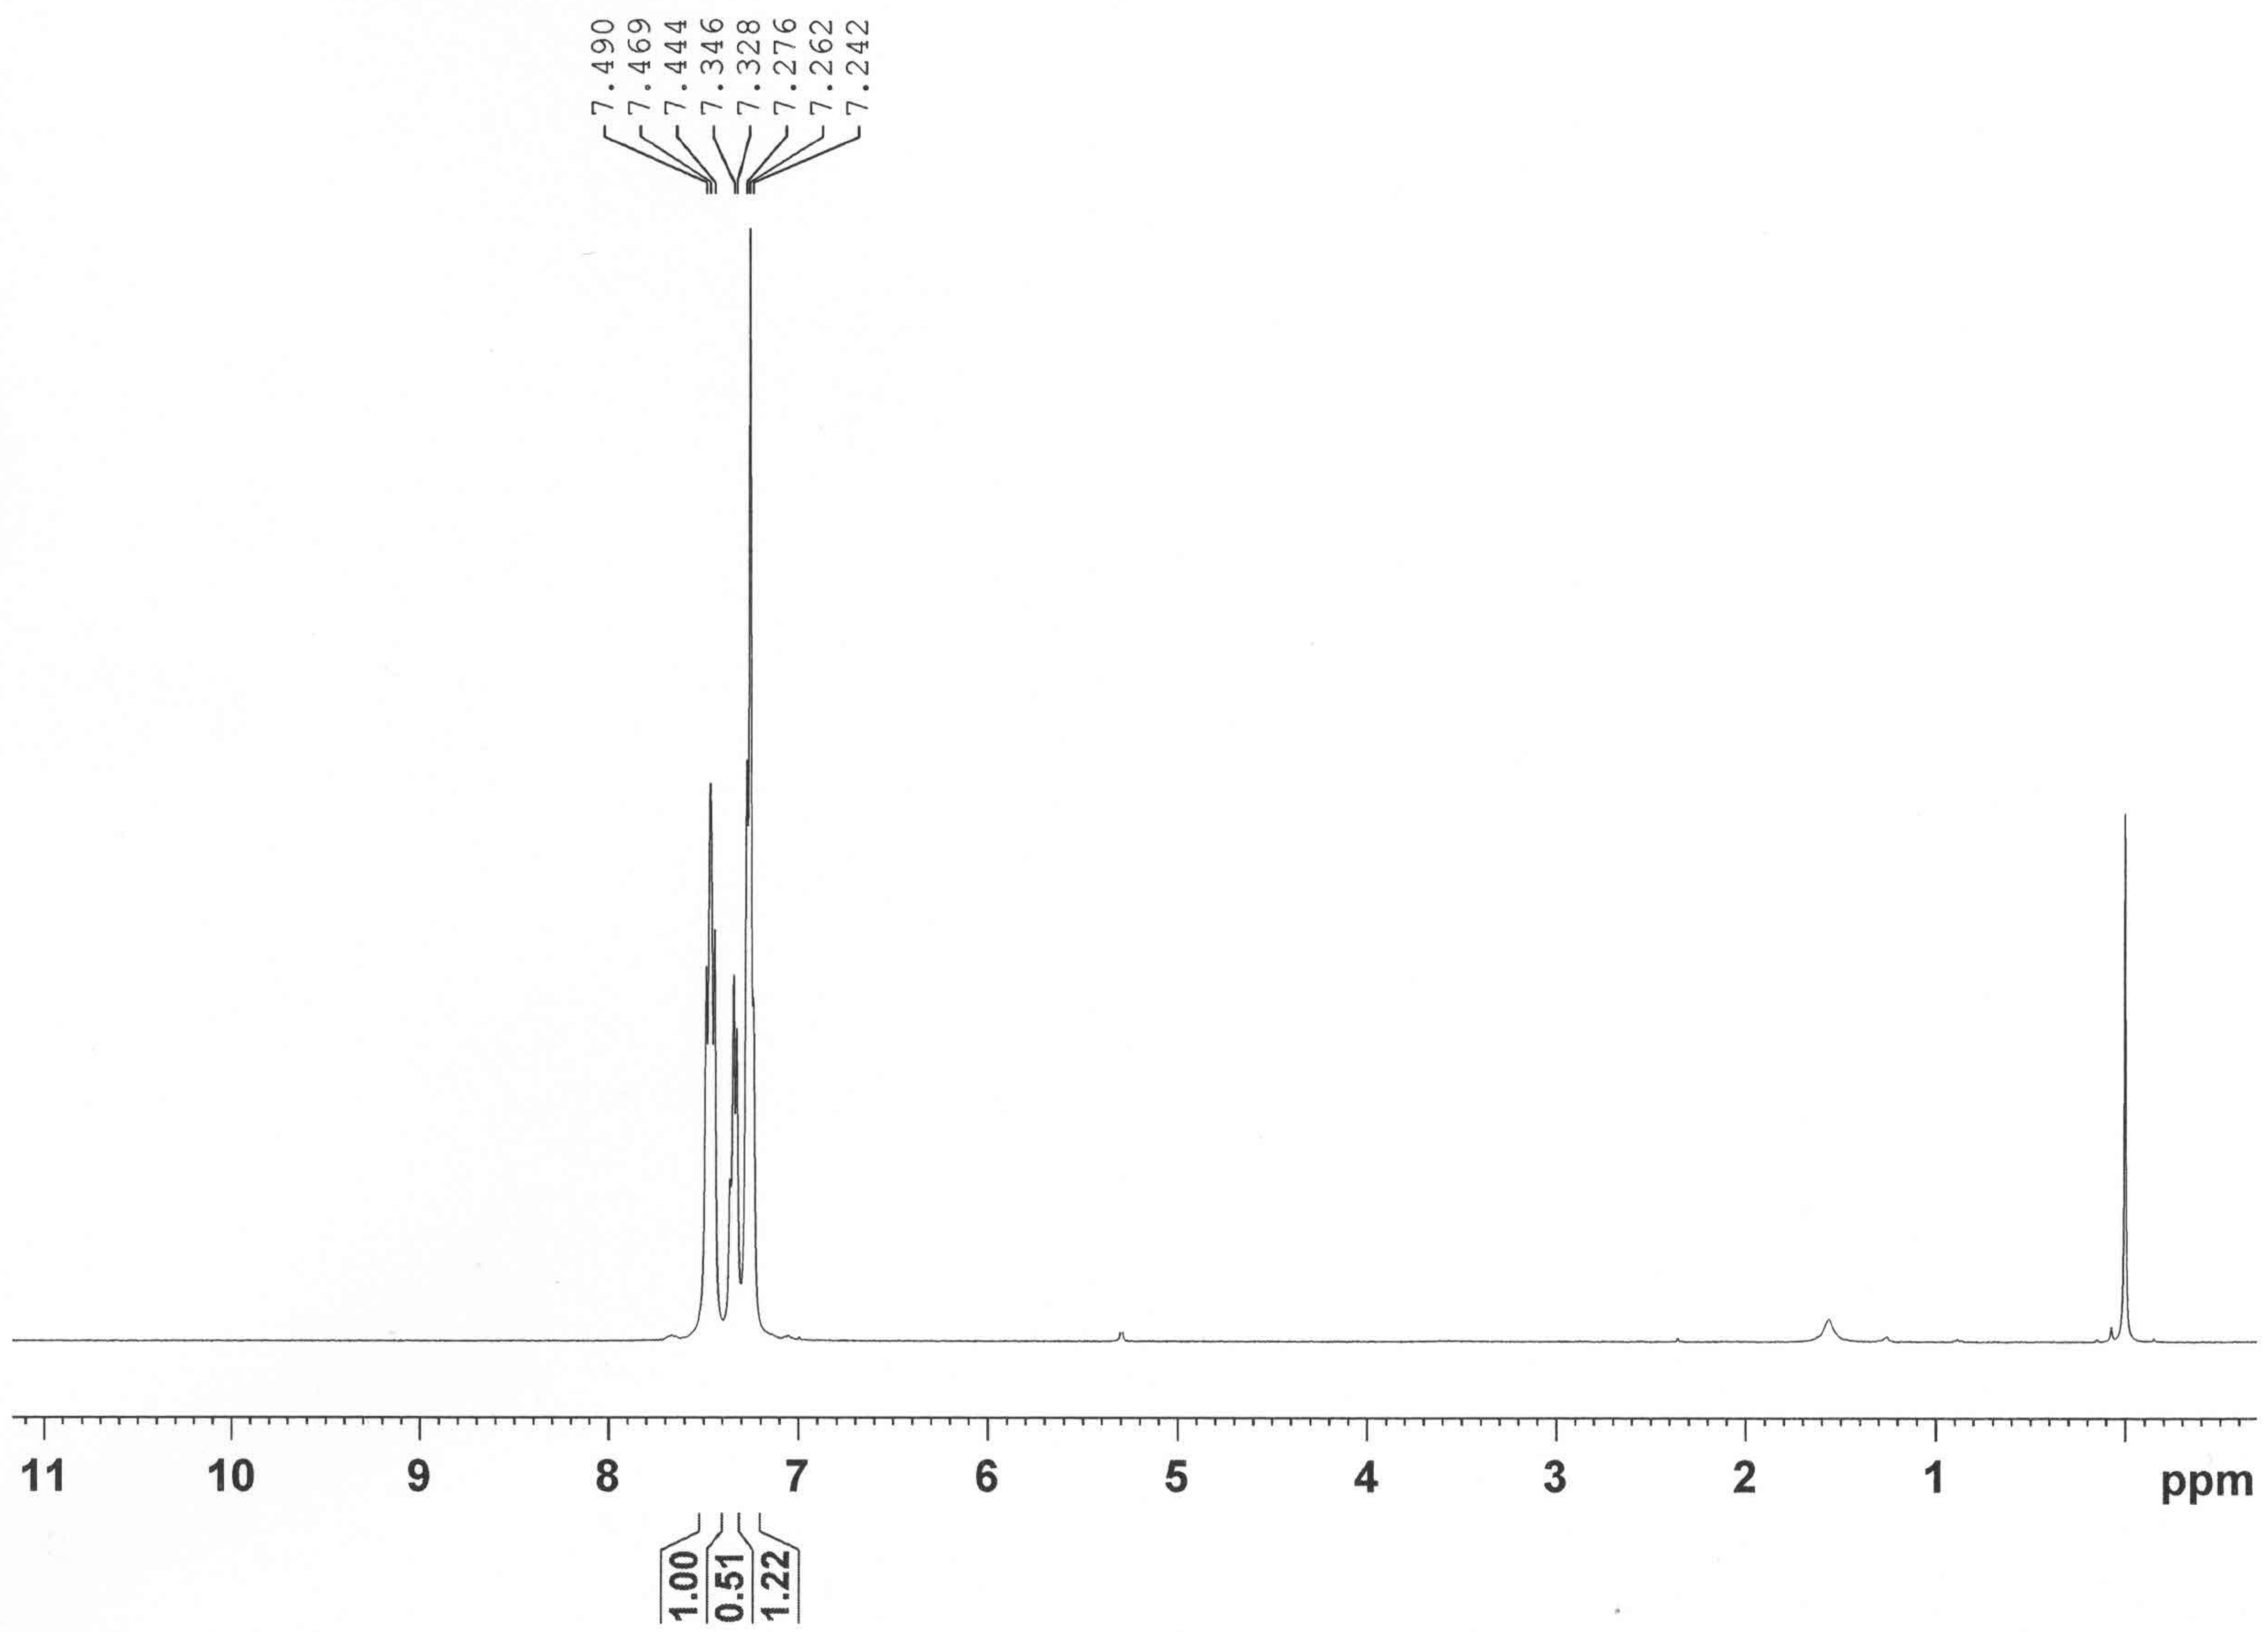

Current Data Parameters  
NAME liyinle  
EXPNO 2013013105  
PROCNO 1

F2 - Acquisition Parameters  
Date\_ 20130131  
Time\_ 11.23  
INSTRUM spect  
PROBHD 5 mm PABBO BB/  
PULPROG zg  
TD 32768  
SOLVENT CDCl3  
NS 4  
DS 0  
SWH 6393.862 Hz  
FIDRES 0.195125 Hz  
AQ 2.5624576 sec  
RG 51.14  
DW 78.200 usec  
DE 6.50 usec  
TE 294.0 K  
D1 6.00000000 sec  
TD0 1

==== CHANNEL f1 =====  
SFO1 399.7827985 MHz  
NUC1 1H  
P1 8.65 usec  
PLW1 35.97499847 W

F2 - Processing parameters  
SI 65536  
SF 399.7800095 MHz  
WDW EM  
SSB 0  
LB 0.30 Hz  
GB 0  
PC 10.00
